# Supplementary material for: Metabolic Basis of Cognitive Improvement Associated With Active B Vitamin Supplementation in Cognitively Impaired Elderly Subjects – A Metabolomics Study
Source: Front Med (Lausanne). 2022 Apr 27;9:864152. doi: 10.3389/fmed.2022.864152 (PMC9091598; doi:10.3389/fmed.2022.864152)
Supplement: Supplementary Table 2 — Metabolome dataset. [file Table_2.XLSX]

## Sheet: Sheet1
HMDB ID	HMDB link	Class	Formula	Metabolite Name	internal_std	MODE	QC1	QC2	QC3	QC4	QC5	QC6	QC7	QC8	QC9	QC10	QC11	QC12	QC13	QC14	QC15	QC16	QC17	QC18	QC19	QC20	QC21	QC22	QC23	QC24	QC25	QC26	QC27	QC28	QC29	3 A	6 A	7 A	9 A	11 A	13 A	14 A	16 A	17 A	18 A	19 A	21 A	23 A	24 A
METLIN 57623		Steroids	C27H44O9	(25R)-11alpha,20,26-trihydroxyecdysone		RP neg	4398	4173	4847	4536	5225	5053	5157	5050	4807	4308	4027	4218	3810	4417	4143	3845	3648	4007	3329	3614	3685	3616	3728	3269	3481	3425	2678	2610	2896	1070	4235	4608	1711	8270	3809	3068	6145	1905	2089	3172	14480	3973	3024
HMDB0002430	http://www.hmdb.ca/metabolites/HMDB02430	Steroidal glycosides	C30H48O10	HMDB0002430		RP neg	3330	2742	3620	3589	3662	2950	3953	4169	3018	2463	3035	2785	2844	2920	2923	3314	2524	2953	2030	2841	2747	3122	2095	2696	2291	3034	2500	2395	2362	1059	2787	2471	878.8	2628	1985	1900	2504	1749	1560	2845	2667	1635	4493
HMDB0000011	http://www.hmdb.ca/metabolites/HMDB00011	Hydroxy acids	C4H8O3	(R)-3-Hydroxybutyric acid		RP neg	49270	44800	44970	42770	41760	44450	41080	41480	40830	42320	52150	54480	51490	58830	52040	55370	53970	50330	54210	66680	55790	55070	56360	52110	38940	44560	46000	46100	45460	37680	52520	22490	75270	69690	44280	24780	18010	35650	24980	69920	50230	74000	39700
HMDB0062281	http://www.hmdb.ca/metabolites/HMDB62281	Lineolic acids	C18H32O4	11-HpODE		RP neg	5355	6686	6260	5750	5882	5949	7202	7514	7281	6977	5222	7803	6405	6110	5882	7349	6885	6101	6336	5832	5900	4316	4129	3715	3996	4861	5014	4418	3860	3144	3291	3855	2110	7404	5066	2983	6794	3566	5092	5772	2926	2093	6223
HMDB0000385	http://www.hmdb.ca/metabolites/HMDB00385	Bile acids	C24H34O4	12a-Hydroxy-3-oxocholadienic acid		RP neg	882	586.4	1092	772.5	579.6	633.5	871	800.9	627.8	548.1	770.7	660.8	565.7	343.1	779	520.5	752	641.4	630.9	563.2	593	546.2	499.5	670.5	524.5	664.9	704.6	541	666.8	63.8	331.1	368.7	292.1	169	426.8	166.3	219.6	172.2	275.6	344.6	167.1	1021	424.4
METLIN 36052		Fatty acids	C18H30O4	13(S)-HpOTrE		RP neg	3983	3302	3332	3601	3630	2745	3720	3723	3144	3567	4130	4327	3406	3033	3099	3473	3026	2496	2891	4029	2548	2521	3444	2752	2221	2337	2746	2876	2127	524.5	1165	1388	1218	1797	9163	1348	9635	1329	3661	2286	2120	1140	1384
HMDB0004667	http://www.hmdb.ca/metabolites/HMDB61708	Fatty Acyls	C18H32O3	13-HODE		RP neg	8022	7416	7229	7961	8137	7729	8217	7893	8404	8401	8350	8198	8184	7482	7112	7719	7368	6586	6802	7692	7330	5238	4997	3998	4736	4651	4290	4849	5334	574.4	1105	1016	1152	5771	672.4	2314	2193	2458	2299	1304	1964	2816	1678
HMDB0029737	http://www.hmdb.ca/metabolites/HMDB29737	Indoles	C9H7NO	1H-Indole-3-carboxaldehyde		RP neg	4396	4912	5121	5989	7188	7403	8541	8975	9701	9478	11320	11550	11350	13170	12430	13850	12600	15950	17260	17600	16190	17540	16080	17580	17640	20230	18250	18760	20930	16390	7765	11180	17510	14210	24230	15780	13050	23260	12850	10370	14590	16250	15330
METLIN 291107		Amino acids	C13H20N2O6	METLIN 291107		RP neg	17130	17930	17040	17100	14780	14410	14160	13660	13730	12340	14180	14090	13880	14330	12350	13430	13200	11880	14810	13000	11230	12830	13100	13940	13190	13270	12920	13430	13580	14020	14130	12480	13000	14200	12770	12580	12750	14130	13710	14010	12750	12800	12360
HMDB0125542	https://hmdb.ca/metabolites/HMDB0125542	Benzoic acids	C8H8O5	2,4-dihydroxy-3-methoxybenzoic acid		RP neg	3902	4070	4149	4008	3984	2946	2943	2563	3652	3341	3229	2805	2725	3042	2881	2467	2099	1946	2339	2196	2212	2354	2309	1677	1114	1259	1319	1562	1259	297.9	672.8	820.4	343.2	2200	361.3	1544	1714	126.7	220.5	147.8	109	4476	422.1
HMDB0130482	https://hmdb.ca/metabolites/HMDB0130482	Benzoic acids	C8H8O5	2,5-dihydroxy-4-methoxybenzoic acid		RP neg	8113	8190	8376	8148	8910	7775	7192	7337	7612	6984	7684	7510	7235	7318	6968	7243	6287	6109	6390	6539	6459	6865	6286	5659	5542	5549	5259	5097	4998	187.6	799.9	187.1	1911	2423	483.3	2351	7871	120	962.8	387.7	406.1	3662	1139
METLIN 545516		Amino acids	C16H18N2O5	METLIN 545516		RP neg	2942	2761	3264	3090	3233	2908	3095	3051	3091	2851	3262	3165	2967	2930	3167	3398	3065	3124	2755	2872	2565	2909	3094	1999	2989	2927	3133	2689	2616	1146	1862	2406	2053	727.5	1907	1552	1910	1201	1536	3124	1582	2443	3652
PubChem647918	https://pubchem.ncbi.nlm.nih.gov/compound/647918	Carboxylic acid	C17H20N2O5	PubChem647918		RP neg	3018	2878	2917	3206	2693	3405	3071	2863	3168	3251	2895	2702	2575	2648	3139	2795	3134	2672	2450	2776	3019	2602	2698	2372	2496	2602	2630	2443	2391	461.5	1226	1991	1055	539.4	764.6	1302	1068	876.9	921	1603	700	971.8	1608
HMDB0001987	http://www.hmdb.ca/metabolites/HMDB01987	Fatty acids	C5H10O3	2-Hydroxy-2-methylbutyric acid		RP neg	50040	53780	53710	52940	52990	51420	49120	47860	49990	49970	48630	47940	47840	48610	46390	46520	45250	45000	44220	44320	45590	46360	45020	42150	39600	42020	41980	42670	40830	20860	26140	19190	67670	85390	36870	31480	22660	27840	34730	91710	58430	49040	35430
HMDB0134105	https://hmdb.ca/metabolites/HMDB0134105	Organic sulfuric acids	C7H6O7S	2-hydroxy-3-(sulfooxy)benzoic acid		RP neg	40120	42030	45070	43780	43370	40230	40650	37040	36470	36110	34040	30790	29380	27440	26570	25400	22930	21520	18940	19520	19940	19360	17330	15730	14210	14250	14370	14370	13710	26360	24020	11630	24450	21840	9513	32530	18790	8600	21350	33660	21080	16660	17740
HMDB0000008	https://hmdb.ca/metabolites/HMDB0000008	Hydroxy acids	C4H8O3	2-Hydroxybutyric acid		RP neg	50480	46220	45880	43740	42330	45340	42570	42030	41730	42870	53080	59700	56080	59690	52770	56150	55050	51100	55480	66110	56780	55980	57330	53540	39880	45500	46660	47050	46230	38210	53390	22740	76560	70730	45350	27130	18290	36480	25410	71320	50820	75200	40170
HMDB0001624	https://hmdb.ca/metabolites/HMDB0001624	Fatty acids	C6H12O3	2-Hydroxycaproic acid		RP neg	4805	3636	3430	3144	3028	2903	3227	3374	2824	3089	2436	3021	3391	2909	3233	2790	2686	3312	2635	2883	3290	3372	2715	3603	2448	2720	2965	2681	2190	1920	2717	2516	1984	2972	1875	2421	2143	1676	1108	10880	1643	2354	2578
HMDB0062550	http://www.hmdb.ca/metabolites/HMDB62550	Organic sulfuric acids	C9H11NO6S	2-methoxyacetaminophen sulfate		RP neg	9468	9248	10090	9433	9365	9278	9603	9343	9208	8810	8657	8515	8712	7994	8443	7966	7573	8014	7800	7196	8065	7001	7483	7366	7063	6922	7385	7696	7440	3567	5714	6024	9039	13670	5824	6373	5952	4230	6254	5414	12780	4913	7138
METLIN 263518		Phenols	C7H8O3	2-Methoxyhydroquinone		RP neg	1476	1521	1687	1515	1617	1563	1331	1473	1024	1169	1084	1491	1484	1205	1385	1349	1100	1854	1045	1292	1373	1385	920	1315	1523	1054	969.4	777.6	1699	162.5	524.3	129.7	733.1	391.5	201	873	1373	106.3	219.5	80.05	406	1501	82.22
HMDB0000339	https://hmdb.ca/metabolites/HMDB0000339	Amino acids	C7H13NO3	2-Methylbutyrylglycine		RP neg	16960	17360	16780	17760	16620	15480	17210	15400	15990	15640	16350	15480	15110	15950	14770	16090	14940	14550	14150	13990	14410	15440	15070	12770	13540	12670	14140	13370	11770	1293	1059	929.3	983.3	944.3	816.2	985.4	939.2	1121	859.3	1118	1066	1041	1377
LMFA01170015	http://www.lipidmaps.org/data/LMSDRecord.php?LMID=LMFA01170015	Fatty acids	C14H26O4	2-methyl-tridecanedioic acid		RP neg	4135	4890	4848	4124	5054	4412	4866	3764	5042	4377	3897	4584	4235	4662	4634	4740	3949	3399	3500	3645	4186	2848	3346	3362	3204	2979	3772	3362	3712	4041	1491	2281	4897	1135	3018	1922	3169	1003	1617	251.5	13510	5012	390.7
HMDB0142074	https://hmdb.ca/metabolites/HMDB0142074	Phenylpropanoic acids	C12H16O5	3-(2,3,4-trimethoxyphenyl)propanoic acid		RP neg	604600	606500	611100	611600	615300	622000	638300	578400	591900	572400	571600	546200	536700	543600	544200	533400	514000	510100	508000	514700	504800	494100	496500	486300	456100	468700	455000	465600	450100	161300	508000	532600	224000	214800	917600	1118000	428400	1264000	96990	508500	634700	1395000	426300
HMDB0031162	https://hmdb.ca/metabolites/HMDB0031162	Carboxylic acids	C6H10O4S	3,3'-Thiobispropanoic acid		RP neg	2190	2391	2525	2492	2702	2506	2501	2271	2389	2582	2472	2527	2584	2348	1955	2450	2079	2205	1996	1836	2163	2146	2291	1517	1522	2113	2065	1526	1662	692.6	1608	1723	1642	3797	1555	2392	1943	1454	1698	2033	2724	1702	1848
HMDB0125533	https://hmdb.ca/metabolites/HMDB0125533	Phenylpropanoic acids	C9H10O4	3,5-Dihydroxyphenylpropionic acid		RP neg	13070	14130	13370	14170	13760	13540	13880	13020	13190	12260	12170	13110	11880	12420	12540	12370	12090	12580	11580	12780	12610	11510	11920	11960	10750	10750	11510	11280	11600	8082	7281	8121	10330	12650	11730	11780	10210	6804	11890	14420	20580	11390	12590
HMDB0003540	https://hmdb.ca/metabolites/HMDB0003540	Nucleosides	C10H14N5O7P	3'-AMP		RP neg	4696	4433	4005	4090	4114	4855	4208	3945	3980	3833	4047	3802	4272	4256	4169	3873	3870	3185	3171	3491	4327	4015	3942	3378	3385	3545	3715	3542	3021	2173	4854	1519	5106	5281	1008	4880	2746	3249	3157	1949	6.984	3904	2069
HMDB0061643	http://www.hmdb.ca/metabolites/HMDB61643	Fatty acids	C14H20O5	3-carboxy-4-methyl-5-pentyl-2-furanpropanoic acid		RP neg	90930	81520	81460	83770	84770	77160	86570	80540	86430	80970	81050	80970	82950	76550	74680	76090	75000	80410	75070	77130	77530	72700	64150	65360	61600	62340	59320	72020	68310	19630	88150	65370	70270	73900	108600	100500	38850	72940	40540	81850	89790	67100	80320
HMDB0012710	https://hmdb.ca/metabolites/HMDB0012710	Alcohols	C7H10O6	3-Dehydroquinate		RP neg	3794	4702	4650	4764	4747	3752	3030	3320	3051	3714	3327	2659	2834	3059	2790	3260	2433	2241	2276	2237	2506	2666	2283	2199	2012	1677	1964	1458	1985	701.5	2122	2383	2086	2151	1082	3257	2308	1396	1504	1593	5118	2622	2657
HMDB0002466	https://hmdb.ca/metabolites/HMDB0002466	Benzoic acids	C7H6O3	3-Hydroxybenzoic acid		RP neg	46450	44770	47650	47940	49240	41980	41950	37660	42840	41050	46850	39090	37220	41230	34490	36430	33590	31770	31470	30560	34460	29770	27910	27900	24560	25690	23420	25640	24300	20760	21230	17100	15420	22580	17930	24960	398000	16890	31880	499300	24940	23820	189100
HMDB0002203	http://www.hmdb.ca/metabolites/HMDB02203	Hydroxy acids	C10H20O3	3-Hydroxycapric acid		RP neg	6318	6973	6375	5618	5669	5581	5258	5492	5270	5777	4962	5507	6027	5570	6251	5140	5114	5118	5245	5498	5518	4927	4388	4362	4458	4173	4627	4662	4756	3295	3739	4565	8769	5590	5279	13220	4637	7783	6765	5279	4931	4411	7991
HMDB0006116	http://www.hmdb.ca/metabolites/HMDB06116	Benzoic acids	C9H9NO4	3-Hydroxyhippuric acid		RP neg	2997	3007	2962	3003	3109	3187	3560	2819	2745	2623	2885	2998	3081	3152	2908	3589	2837	2747	2459	2363	2404	2963	2494	2885	2358	2233	2888	2398	2233	1065	206.5	1716	3511	14870	2372	1748	1773	3926	5032	1914	2733	697.1	701.2
HMDB0000754	https://hmdb.ca/metabolites/HMDB0000754	Fatty acids	C5H10O3	3-Hydroxyisovaleric acid		RP neg	6872	6909	6770	7097	7225	6885	6681	6662	6587	7054	6412	6568	6323	7045	6382	6432	5934	6557	6164	6604	6590	6099	6298	5932	6264	6185	6199	5928	5667	11380	14490	12260	12480	11780	12200	11510	10140	9432	10490	43180	14650	19170	20580
HMDB0059765	https://hmdb.ca/metabolites/HMDB0059765	Indolyl carboxylic acids	C11H11NO3	3-Indolehydracrylic acid		RP neg	10780	10180	10440	9757	10520	10800	11170	10340	10430	10360	10160	9832	10040	10160	8404	9109	9196	9984	9345	9214	10080	8502	9715	8315	8477	7965	8360	8444	8210	5193	7413	7426	7184	24200	8085	12160	10760	7738	9304	14420	19050	13420	9445
HMDB0002302	http://www.hmdb.ca/metabolites/HMDB02302	Indoles	C11H11NO2	3-Indolepropionic acid		RP neg	19050	20220	19690	19950	20060	20710	19550	18600	19620	18630	19200	18310	18150	19490	17090	18790	18580	16140	16850	17290	17890	18030	16510	16270	15820	14530	16590	16370	15960	1446	1084	4446	6257	2060	477.7	2740	9093	3529	2211	87220	11840	818.8	102400
HMDB0001434	https://hmdb.ca/metabolites/HMDB0001434	Amino acids	C10H13NO4	3-Methoxytyrosine		RP neg	543	543.8	502.9	408.1	384.9	491.9	465.1	468.5	552.9	427.6	330	469.5	473.8	515.4	384.6	372.5	431	470.2	476.6	463.3	475.9	426.3	492.9	486.1	451.8	587.8	363.1	659.8	419.8	231.8	351.4	278.1	170.4	313.5	492.4	454.2	564.9	329.5	424.6	338	415.2	283.7	582.7
HMDB0010724	http://www.hmdb.ca/metabolites/HMDB10724	Keto acids	C10H18O3	3-Oxodecanoic acid		RP neg	6138	6724	4902	6886	6374	5855	5211	5466	4994	6753	5488	5956	7312	6414	5963	6326	5595	6515	6441	5945	5489	5638	6397	6088	4320	4187	5057	4130	5642	4000	4770	5794	5729	9870	7519	8375	9486	8950	14060	9957	6414	4381	12730
HMDB0010730	https://hmdb.ca/metabolites/HMDB0010730	Fatty acids	C14H26O3	3-Oxotetradecanoic acid		RP neg	3029	2340	2512	2295	2180	2607	2650	2041	2255	2055	1936	1444	1938	1801	2332	2122	2037	1710	2059	1650	2300	1989	1099	1665	1351	1149	1526	1557	1185	470	1618	851.2	465.7	1580	1480	1549	817.5	329.2	229	2301	881.6	1806	345.9
HMDB0011718	https://hmdb.ca/metabolites/HMDB0011718	Organooxygen compounds	C7H6O2	4-Hydroxybenzaldehyde		RP neg	14560	13460	15910	13040	14200	13380	14860	13430	13780	17530	15910	16550	14850	17640	14420	15210	14280	11910	14180	10900	17300	15800	17340	12390	8638	14360	11580	15520	10270	9397	16910	18150	12160	14460	16220	17650	12240	11530	16000	16350	14290	13660	18190
HMDB0000710	https://hmdb.ca/metabolites/HMDB0000710	Hydroxy acids	C4H8O3	4-Hydroxybutyric aci		RP neg	50560	46360	45980	43860	42390	45410	42640	42100	41830	42930	53170	59860	56200	59750	52820	56200	55110	51190	55610	66240	56850	56050	57440	53710	39980	45610	46740	47160	46310	38230	53500	22770	76700	70830	45490	27160	18310	36570	25460	71420	50940	75320	40210
HMDB0000017	https://hmdb.ca/metabolites/HMDB0000017	Pyridines	C8H9NO4	4-Pyridoxic acid		RP neg	4299	3942	3933	3854	4083	4296	3947	3653	3945	3708	3364	4401	3742	4241	4033	3980	3689	3882	4135	3602	3820	3496	3052	2542	2752	2667	2166	2638	2259	708.5	2132	1237	1561	4883	2263	627.2	1767	2271	1306	1927	2940	1182	1693
HMDB0000525	http://www.hmdb.ca/metabolites/HMDB00525	Hydroxy acids	C6H12O3	5-Hydroxyhexanoic acid		RP neg	4805	3636	3430	3144	3028	2903	3227	3374	2824	3089	2436	3021	3391	2909	3233	2790	2686	3312	2635	2883	3290	3372	2715	3603	2448	2720	2965	2681	2190	1920	2717	2516	1984	2972	1875	2421	2143	1676	1108	10880	1643	2354	2578
HMDB0000763	http://www.hmdb.ca/metabolites/HMDB00763	Indoles	C10H9NO3	5-Hydroxyindoleacetic acid		RP neg	2482	2595	2927	2729	2878	2817	2548	2573	2462	2637	2625	2493	2569	2749	2645	2516	2550	2390	2355	2457	2416	2416	2377	2443	2308	2538	2473	2153	2247	215.7	246.5	224.4	868.8	459.8	386.4	480.3	616.8	246.8	267.2	337.7	295.8	486.1	747.8
HMDB0000472	http://www.hmdb.ca/metabolites/HMDB00472	Amino acids	C11H12N2O3	5-Hydroxy-L-tryptophan		RP neg	909.1	951.5	1073	940.3	1130	938.1	1158	1287	1119	1338	1478	1225	1210	1291	1277	1073	1107	1274	1006	1212	1266	1051	1256	1136	1108	1268	1145	1333	1115	1158	1308	767.2	1119	1577	1317	1573	1426	1228	1678	1297	1429	1503	1967
HMDB0033019	http://www.hmdb.ca/metabolites/HMDB33019	Carbohydratesydroxyterpineol 8-glucoside	C16H28O7	7-Hydroxyterpineol 8-glucoside		RP neg	4560	4063	4536	4723	4545	4096	5034	4563	4290	4463	3878	3684	3895	3776	3825	3679	3407	3772	3552	2647	3237	3626	3996	3274	2919	2873	3316	3161	3071	1331	2922	2228	559.4	843.8	418.4	635.3	212.6	509.1	1728	141.9	3619	1536	629.3
HMDB0001973	https://hmdb.ca/metabolites/HMDB0001973	Purines	C6H6N4O3	9-Methyluric acid		RP neg	8432	8115	8043	7029	6948	6692	6258	6318	6300	6591	6939	7154	7366	9450	7508	7774	8912	8795	8600	9200	9321	8973	8810	7097	8205	7538	6536	6910	6617	474.2	5460	3698	4213	36270	13710	2795	3467	3672	7349	6584	16880	1747	4889
HMDB0010316	https://hmdb.ca/metabolites/HMDB0010316	Carbohydrates	C14H17NO8	Acetaminophen glucuronide		RP neg	24230	23900	26890	26330	24650	24920	24560	22630	22500	22090	22750	22950	23910	23240	22860	22430	22400	22730	20710	21710	21640	21580	22160	20960	19860	20880	21070	21370	19560	41280	50.65	127.6	78.56	167.4	14.74	40.68	72.96	9.812	111.4	142.3	108.4	72.65	51.25
HMDB0000532	https://hmdb.ca/metabolites/HMDB0000532	Amino acids	C4H7NO3	Acetylglycine		RP neg	1698	1778	1919	1919	2038	1939	2089	2026	1753	1785	2259	1882	1892	1674	1882	1786	1828	1473	1557	1633	1784	1575	1447	1638	1324	1468	1692	1381	1805	899	2168	1541	1429	1611	1580	1936	1575	1002	951.5	2863	1501	1405	1083
HMDB0028683	http://www.hmdb.ca/metabolites/HMDB28683	Amino acids	C7H12N2O5	Alanylaspartic acid		RP neg	13590	13310	12940	12770	11450	13100	13580	13350	11600	11950	12010	11910	13560	13280	11610	13050	11540	12560	10200	13020	11870	11770	11970	12600	12230	11410	10160	10640	10830	7349	12640	14710	13390	11010	16720	12590	13190	8762	11200	14890	17910	12550	12200
HMDB0000462	https://hmdb.ca/metabolites/HMDB0000462	Imidazoles	C4H6N4O3	Allantoin		RP neg	10990	12010	12050	12610	12950	13030	13170	12700	13410	13080	13720	12750	12390	13290	12910	13400	12990	11730	12150	12570	13040	12690	12420	11780	11430	12140	11970	11550	11520	8158	10390	14960	11160	7748	6532	31790	12910	18330	10370	7555	10890	10160	10130
HMDB0030985	https://hmdb.ca/metabolites/HMDB0030985	Lactones	C11H18O4	alpha-Carboxy-delta-decalactone		RP neg	2865	3153	3024	3607	2929	2976	2985	3355	3382	2866	3312	2758	3280	2817	2872	2956	3152	2898	3162	2308	2682	3116	2840	2380	1801	2905	2508	2199	1970	1097	2743	2366	349.1	4775	2812	8389	1518	1592	1566	9053	840.3	49.92	1480
HMDB0000539	http://www.hmdb.ca/metabolites/HMDB00539	Carbohydrates	C5H10O6	Arabinonic acid		RP neg	33280	32020	32920	31120	33360	30140	29400	27950	29720	30730	30050	28510	29270	29910	28940	29880	27250	25580	27970	27210	28080	28520	28270	22950	23650	21750	21650	22160	20080	11340	22040	18290	22780	59310	15390	18900	15340	12770	15960	14670	36570	21470	24050
METLIN 15959		Amino acids	C18H28N6O5	Arg Ser Phe		RP neg	2465	2344	2547	2234	2378	2434	2668	1996	2225	2113	2304	2296	1915	2174	1940	2145	1580	1665	1560	1839	2134	1750	1676	1444	1589	1417	1221	1637	1340	615.6	1097	1413	1186	1131	743.7	767	1948	760.3	1179	1611	2375	1814	486.8
METLIN44901		Carboxylic acid	C14H22O4	C75		RP neg	7611	8243	8163	7241	7005	8679	7755	6734	7381	7014	14870	15100	14670	15500	15240	14390	13710	15800	12860	12440	17450	13920	12590	10750	12810	9021	8582	8567	8612	19650	11890	12130	19410	22020	14640	13450	11370	12830	10070	9988	10390	21400	23830
HMDB0000832	https://hmdb.ca/metabolites/HMDB0000832	Amino acids	C10H19NO3	Capryloylglycine		RP neg	1044	1210	1327	1118	924.1	1369	1333	1139	1123	1154	979.9	1132	1055	1056	1191	1049	1222	993.6	977.2	929.3	1009	612.5	1096	950.9	868.8	853.6	609.7	826.1	1070	194	889.2	868.9	741.9	901.6	1112	1744	2751	439.6	329.2	1066	1225	913	1051
HMDB0000518	https://hmdb.ca/metabolites/HMDB0000518	Bile acids	C24H40O4	Chenodeoxycholic acid		RP neg	6285	5689	5961	6886	6592	6578	7073	6773	6201	6692	6829	6902	6764	6996	6756	6661	6155	6247	5756	6351	6860	6206	5425	4909	5323	5562	5346	5406	5256	5429	2855	5904	4249	4031	17350	18120	1575	1795	7866	12800	3051	4872	2782
HMDB0006898	https://hmdb.ca/metabolites/HMDB0006898	Bile acids	C26H43NO5	Chenodeoxyglycocholic acid		RP neg	8190	7342	8714	8007	9347	9058	8762	8552	7942	8094	7619	7586	6958	7842	7276	7149	6426	7150	5904	5889	7312	6997	6846	5909	5339	5619	6721	5585	5598	4328	1858	566.5	2857	780.4	3277	4728	3050	15950	8410	3633	3417	1887	51340
HMDB0000619	http://www.hmdb.ca/metabolites/HMDB00619	Bile acids	C24H40O5	Cholic acid		RP neg	1149	649.7	2246	1478	2543	2937	2470	2545	2138	2874	2250	2012	1656	2409	2190	2443	1714	2187	754.9	1968	2697	2008	1864	1211	977.8	1023	1803	1428	1075	524.4	151.2	623.3	542.4	2730	5345	34950	331	310.2	746.7	1009	159.7	102.1	388.5
HMDB0011621	http://www.hmdb.ca/metabolites/HMDB11621	Amino acids	C11H11NO3	Cinnamoylglycine		RP neg	10680	10050	10380	9666	10460	11020	11130	10310	10360	10320	10100	9759	9990	10090	8366	9065	9149	9923	8751	9178	10050	8440	9663	8229	8396	7913	8300	8459	8109	5187	7383	7409	7147	24020	7993	12100	10720	7642	9258	14830	18890	12650	9407
HMDB0000904	https://hmdb.ca/metabolites/HMDB0000904	Amino acids	C6H13N3O3	Citrulline		RP neg	56492.1	55529.4	57318.1	57272	56574.5	55537.8	56387.9	57220.4	56968.4	57103	57015.5	56011.1	57178.4	57848.8	55929.3	58359.1	56953.7	57401.5	56996	57289.9	55461.4	57459.2	57418.3	56127.7	54215.2	54475.1	57359.6	56655.4	53673	35930.9	45453.8	51289.7	74714.6	98366.5	58736.9	52959.2	65359.8	63666.2	41537.4	15840.2	47643.4	29638.4	65071.5
HMDB0010320	https://hmdb.ca/metabolites/HMDB0010320	Steroidal glycosides	C27H42O11	Cortolone-3-glucuronide		RP neg	6397	5830	7745	7291	7681	6732	7437	6996	7028	7132	6890	6886	6654	6697	6625	7011	6673	6084	5376	6051	6534	6255	6483	5548	5922	5670	6040	5787	5353	3842	4524	4595	6088	18600	1428	7133	6866	2876	3477	4512	3497	6246	4466
HMDB0007007	http://www.hmdb.ca/metabolites/HMDB07007	Lineolic acids	C21H37O6P	CPA(18:2(9Z,12Z)/0:0)		RP neg	665.7	704.4	751.7	641.9	721.3	636.9	856.6	714.7	722.1	636.4	515.2	586.7	448.9	683	460.4	646.2	541.2	470	417.6	546.9	536.5	408.7	502.8	465.5	331.1	439.6	322.5	535.9	518.6	432.1	736.3	484.4	322.9	359.4	493	483.4	518.2	400.7	517.9	495	568.2	647.5	838.9
HMDB0031340	http://www.hmdb.ca/metabolites/HMDB31340	Sulfamic acid	C6H13NO3S	Cyclamic acid		RP neg	61160	63640	65080	65030	61230	56850	57030	59370	56660	53610	57140	53380	52950	52170	55540	57950	53150	48240	49010	54040	53480	50680	53940	49860	44810	48800	43520	45860	49980	29880	19050	6273	30760	89420	86760	119900	49990	43590	18560	13310	71210	175600	51750
HMDB0000626	https://hmdb.ca/metabolites/HMDB0000626	Bile acids	C24H40O4	Deoxycholic acid		RP neg	6346	5777	5979	6944	6594	6554	7116	6813	6240	6692	6844	6924	6781	7006	6752	6556	6189	6254	5807	6367	6879	6234	5436	4956	5360	5597	5361	5417	5315	5439	2867	5928	4270	4034	17400	18130	1575	1796	7890	12820	3056	4874	2784
HMDB0000127	https://hmdb.ca/metabolites/HMDB0000127	Carbohydrates	C6H10O7	D-Glucuronic acid		RP neg	9763	10110	10120	9854	10920	9712	9531	9104	8873	10510	9748	9107	8961	9913	8385	9151	8398	7764	8638	7919	7648	8432	7951	6733	6776	6199	7337	6892	7458	4352	6545	8983	8723	23390	5486	9989	6791	4817	6112	6443	10300	8478	6717
HMDB0000076	http://www.hmdb.ca/metabolites/HMDB00076	Pyrimidines	C4H6N2O2	Dihydrouracil		RP neg	97150	114500	98780	110000	93720	90290	91210	89830	91170	78780	82900	92050	97530	90380	80090	90550	93320	79670	110700	91490	79190	87180	86450	102100	94580	96030	81360	91580	98820	59900	86990	95200	123600	158300	83410	76950	52590	80400	72050	61160	80330	84890	70620
HMDB0000148	http://www.hmdb.ca/metabolites/HMDB00148	Amino acids	C5H9NO4	L-Glutamic acid		RP neg	375379	362281	378077	374973	389411	357075	363642	361404	359876	378411	369972	368148	368062	365768	368444	376281	364147	371312	367359	382867	385520	367676	357953	365486	382350	347436	359859	371690	362220	175560	308364	362624	366899	421478	270787	360353	228901	286692	240762	285698	432746	334625	342966
HMDB0000187	https://hmdb.ca/metabolites/HMDB0000187	Amino acids	C3H7NO3	L-Serine		RP neg	33609.2	31578.8	33892.7	32838.3	33701.4	33729.8	32824.5	32931.6	31718.7	33912	34552.7	32835.4	32992	33193.3	32978.6	33094.8	32487.7	31822.8	31676.6	33552.3	34478.8	33186.8	33208.3	31487.9	32807.5	31061.6	32510	32548.2	32608.5	22808.3	35197.4	41911.6	32729.6	22669.2	49859.9	29373.8	29601.3	21938.2	29515.3	32840.7	30166	29955.4	47249.5
HMDB0002183	http://www.hmdb.ca/metabolites/HMDB02183	Fatty acids	C22H32O2	Docosahexaenoic acid		RP neg	705.2	564.7	773.7	734.3	592.2	646.2	526.2	508.2	617.2	636.8	459.7	450.6	552	559.6	558.4	551.3	598.8	541.4	413.6	602.5	533.7	494.4	412.6	451.4	221.2	452.6	450.3	445.5	430.3	103.6	171.2	343.6	51.17	130.3	254.5	120.9	166.3	296.7	207.5	175.9	205	473.6	175.7
HMDB0000623	https://hmdb.ca/metabolites/HMDB0000623	Fatty acids	C12H22O4	Dodecanedioic acid		RP neg	6960	8619	7813	7290	6816	6315	6876	6686	7033	5423	7221	6486	6847	7806	6610	6909	8041	7050	6958	6375	7081	7655	6954	5969	6178	7310	6765	6969	6997	8554	7510	7409	7857	10370	7443	7197	9583	7260	5962	12310	7432	8246	8205
HMDB0000563	http://www.hmdb.ca/metabolites/HMDB00563	Phenylpropanoic acids	C9H10O3	D-Phenyllactic acid		RP neg	8257	8127	8567	8341	9248	9048	9407	7818	9204	9127	7955	7777	8221	9179	7325	7515	7328	7802	7630	8139	7583	7595	7076	6139	6625	7169	6024	6349	7096	3145	2639	6103	6220	6744	4923	5083	5351	12520	6245	6402	6604	4171	22710
METLIN 67422		Steroidal glycosides	C26H42O8	Fusicoccin H		RP neg	1294	1215	1833	1333	1730	1306	1673	1165	1349	1155	871.8	1135	1498	1169	989.6	998.4	976.8	897.9	1073	790.4	1115	1091	1039	772.1	955.4	914	1035	927.9	856.1	170.6	2919	288.8	1141	399.4	137.9	83.72	612.7	688.7	365.2	230	2429	409.8	2510
HMDB0001931	https://hmdb.ca/metabolites/HMDB0001931	Benzopyrans	C15H20O4	gamma-CEHC		RP neg	1023	1058	978.6	764.1	687.5	1034	1407	1096	1008	774.6	925.8	693.1	1026	900	688.7	802.4	728.5	1053	839.8	784.1	1115	1062	817.4	762.8	1018	1205	627.2	805.8	617.2	262.3	437.9	117.7	233.7	244.9	536.3	141.8	101.6	116.7	198.3	818	223.3	266.3	262
HMDB0028833	http://www.hmdb.ca/metabolites/HMDB11738	Amino acids	C10H17N3O6	Gamma-Glutamyl Glutamine		RP neg	30050	29730	30890	29870	27040	28540	28130	29920	29190	28280	28640	29520	26470	27710	29680	27890	27350	29440	27710	28560	28250	27480	29280	27120	25710	24600	27670	23840	27230	24320	27120	33680	32160	16980	51930	22440	31750	20260	19600	32320	26770	21230	43990
HMDB0034367	https://hmdb.ca/metabolites/HMDB0034367	Amino acids	C10H18N2O5S	gamma-Glutamylmethionine		RP neg	2204	2358	2297	2141	2364	2430	2084	2118	1917	2365	2229	2156	2229	1971	1816	2011	2062	2042	1888	2205	2074	2242	1844	1984	1929	2229	2076	1858	2014	404.1	1303	1654	1914	1056	3015	1598	1789	861.5	1035	1949	2240	1549	3317
HMDB0000625	http://www.hmdb.ca/metabolites/HMDB00625	Carbohydrates	C6H12O7	Gluconic acid		RP neg	62490	59910	59180	59580	60080	54020	54910	50460	51870	52580	52210	52670	51470	53460	50520	53870	49920	46480	47480	43250	49960	46290	43960	38920	35800	37740	37410	42210	36670	27280	54070	52250	60550	234300	37060	110200	34930	29650	46590	40360	77080	50470	180300
HMDB0028796	https://hmdb.ca/metabolites/HMDB0028796	Amino acids	C10H17N3O6	Glutaminylglutamic acid		RP neg	27310	27260	28050	29160	26770	28310	27740	27560	27380	28050	28450	29190	26900	27400	29590	27490	26820	29230	26750	25950	25770	27220	26880	24480	25060	23630	27370	23500	24000	25130	26730	33370	31640	16810	47400	22220	30750	19750	18940	30900	26610	21040	43790
HMDB0000661	https://hmdb.ca/metabolites/HMDB0000661	Carboxylic acids	C5H8O4	Glutaric acid		RP neg	2566.08	2721.12	3011.08	2637.56	2611.02	2455.74	2388.89	2467	2628.8	2463.19	2261.3	2485.3	2310.55	2932.8	2810.46	2551.31	2323.22	2248.84	2310.75	2799.63	2126.87	2864.34	2798.31	2965.49	2496.64	2685.72	2975.44	2145.87	2357.86	2091.12	1530.1	1241.79	1256.89	1920.53	2782.72	3071.75	2543.82	3182.8	2347.28	1876.81	1313.88	2494.71	3623.78
HMDB0000139	http://www.hmdb.ca/metabolites/HMDB00139	Carbohydrates	C3H6O4	Glyceric acid		RP neg	6173	6475	6433	6681	6612	6619	6596	6672	6952	7222	7126	6814	7110	7648	7096	7809	7913	8365	7813	7845	7973	8337	8567	8421	8282	8821	8734	8818	8217	3422	8357	7151	4913	3179	6116	2996	3628	7013	4771	4026	7390	7599	10730
HMDB0000114	https://hmdb.ca/metabolites/HMDB0000114	Glycerophospholipids	C5H14NO6P	Glycerylphosphorylethanolamine		RP neg	10940	12340	11140	11890	10440	10660	12170	11750	11200	10600	10450	11150	11870	11740	9694	10780	10570	9560	12060	10890	9985	10070	9948	11510	10390	10870	9783	9870	10500	7426	9474	10260	9943	11050	10410	9053	8938	8617	8910	19410	9925	8433	11540
HMDB0000123	http://www.hmdb.ca/metabolites/HMDB00123	Amino acids	C2H5NO2	Glycine		RP neg	13750	13760	13990	13950	14170	13400	13110	12950	13780	13680	13540	13140	13370	13680	13540	13790	12980	12450	12470	13340	12910	12800	13080	12860	11280	10920	12710	11220	11360	8557	14350	14550	12170	9426	15750	12800	13090	9956	12100	11060	13630	11290	15350
LMST05030008	https://www.lipidmaps.org/data/LMSDRecord.php?LMID=LMST05030008	Bile acids	C26H43NO5	Glycochenodeoxycholic acid		RP neg	34130	29260	43680	35720	46070	43570	42810	41240	37260	41360	39630	37380	40020	39540	36460	37300	31910	32220	24930	31650	37820	31760	31180	22170	24360	25930	27640	26810	25660	16190	7428	9825	13250	13130	13480	18130	23070	25480	20840	10600	27590	11450	80400
HMDB0000138	https://hmdb.ca/metabolites/HMDB0000138	Bile acids	C26H43NO6	Glycocholic acid		RP neg	19790	16950	21280	20190	21940	21920	21090	20360	19480	19430	19300	18820	17640	18810	18350	17400	16200	17470	15420	16050	16080	16370	15690	15180	14310	15330	15360	14990	13120	4118	2466	4390	7142	993.2	10410	4621	5234	2861	6306	1131	13000	5860	7841
HMDB0000115	https://hmdb.ca/metabolites/HMDB0000115	Hydroxy acids	C2H4O3	Glycolic acid		RP neg	2526	2460	2313	2326	2500	2074	2136	2165	2211	2143	2287	2350	2462	1901	2554	2573	1248	2166	2654	2559	2360	1912	1831	2031	1187	1663	1425	1474	1372	1118	2330	1962	2006	1973	1507	1490	1766	556.8	1874	1760	2981	2197	1912
HMDB0000714	https://hmdb.ca/metabolites/HMDB0000714	Benzoic acids	C9H9NO3	Hippuric acid		RP neg	53464.2	59939.7	54782.7	51737.3	51186.5	49764.3	52487.7	56005.3	53677.6	48354.3	51840.2	51135.6	48002.5	49803.2	55967.1	57047	50755.3	49218.7	50477.1	54424.4	56122.1	55266.5	52092.1	50891.8	52868.4	53472.4	52043.4	54868.9	52060.2	31554.3	18661	6546.12	31656.7	83469.4	97926.5	118884	46970	46987.1	17930.2	13478.6	72570.3	172634	51981.6
HMDB0028895	https://hmdb.ca/metabolites/HMDB0028895	Amino acids	C10H16N4O4	Histidylthreonine		RP neg	5753	5392	5315	5532	5277	5102	5626	5073	5172	5039	5445	5454	5160	4857	5645	5043	4985	4624	4421	5353	4826	5072	4503	5019	4906	4568	4278	4805	4435	1729	3140	5180	2641	562.8	1344	1758	1841	2512	1446	2802	2080	2311	3688
HMDB0000764	https://hmdb.ca/metabolites/HMDB0000764	Phenylpropanoic acids	C9H10O2	Hydrocinnamic acid		RP neg	6567	6852	6044	7023	6347	6858	6113	6385	7031	7144	6050	6522	6854	6143	6037	6748	6629	5678	5894	6404	6098	5740	6329	5669	5434	5543	4558	5359	5843	8235	6561	6820	6289	7045	5343	7034	7334	4482	6177	6963	9583	7604	5900
HMDB0000746	https://hmdb.ca/metabolites/HMDB0000746	Fatty acids	C6H12O3	Hydroxyisocaproic acid		RP neg	4798	3621	3426	3138	3024	2900	3221	3365	2825	3085	2432	3014	3389	2905	3226	2786	2677	3323	2622	2878	3289	3357	2704	3600	2441	2719	2964	2743	2187	1916	2715	2511	1991	2965	1864	2415	2144	1667	1104	10870	1636	2350	2575
HMDB0000711	http://www.hmdb.ca/metabolites/HMDB00711	Fatty acids	C8H16O3	Hydroxyoctanoic acid		RP neg	4321	3842	3860	3872	3717	4411	4446	3447	3773	3485	4534	3685	4002	3990	3637	3692	3114	2866	3533	4041	3426	2704	3160	3384	3004	3548	2859	3208	3170	2131	3385	3018	3553	4152	4490	7531	4785	2426	3657	4956	4613	3050	6556
HMDB0000755	http://www.hmdb.ca/metabolites/HMDB00755	Phenylpropanoic acids	C9H10O4	Hydroxyphenyllactic acid		RP neg	12810	14030	13290	14080	13720	13450	13810	12990	13090	12230	12110	13020	11800	12380	12500	12350	12030	12510	11510	12700	12570	11490	11850	11860	10680	10680	11470	11210	11490	8064	7309	8391	10260	12600	11680	11760	10160	6766	11830	14360	20530	11360	12570
HMDB0000197	http://www.hmdb.ca/metabolites/HMDB00197	Indoles	C10H9NO2	Indoleacetic acid		RP neg	3728	3780	3929	3559	4024	3610	3839	3271	3501	3434	3549	3219	3008	3357	3077	3659	3233	2866	3145	3302	3184	3286	3165	2988	2220	2733	2704	2143	2690	691.5	1782	1576	1339	3509	5338	10820	2014	1537	2887	5759	1943	2309	3623
METLIN 389405		Amino acids	C16H18N2O5	Indolebutyroyl aspartic acid		RP neg	1847	2063	2188	2015	2195	2135	2068	1931	2174	2245	2352	2115	2210	2228	1971	2064	1899	2112	1692	1708	1444	1858	2164	1662	2412	2004	2148	2308	1802	714	1376	1541	1083	1017	1569	1412	1785	1412	920.1	2412	1329	1691	2476
HMDB0000671	http://www.hmdb.ca/metabolites/HMDB00671	Indolyl carboxylic acids	C11H11NO3	Indolelactic acid		RP neg	10610	9961	10320	9591	10400	10990	11110	10280	10300	10280	10060	9712	9957	10040	8341	9024	9100	9878	8681	9132	10030	8414	9628	8144	8320	7878	8259	8427	8046	5179	7362	7382	7098	23920	7948	12060	10680	7582	9212	14790	18790	12590	9382
HMDB0000195	http://www.hmdb.ca/metabolites/HMDB00195	Purine nucleosides	C10H12N4O5	Inosine		RP neg	904.721	825.2	630.248	817.829	978.357	1052.7	984.24	919.166	944.324	1120.59	931.167	1063.08	1208.46	1064.96	1152.89	943.677	1077.94	1172.04	1103.82	1172.71	1347.68	1103.02	1018.04	1098.84	1198.87	1321.52	1148.23	1166	821.171	784.545	705.856	540.802	1526.86	764.962	1098.31	3381.07	690.602	35321.6	473.018	1781.11	582.46	890.7	840.363
PubChem 92136	https://pubchem.ncbi.nlm.nih.gov/compound/92136#section=2D-Structure	Amino acids	C6H11NO4	L-2-Aminoadipic acid		RP neg	1789	2046	2043	2373	1995	1890	2115	1491	2534	2257	1793	1906	1777	1828	1587	1439	1966	1746	1652	1955	1717	2044	1587	2149	1304	1649	1581	1738	1889	596.9	2436	1367	1547	1065	1889	2461	1246	1555	1023	1249	3152	2828	2302
HMDB0000168	http://www.hmdb.ca/metabolites/HMDB00168	Amino acids	C4H8N2O3	L-Asparagine		RP neg	22610	22810	22980	22890	24760	22890	22330	21880	21790	22410	22380	20860	21780	21920	20930	20700	20660	20160	19520	21120	20770	20250	20060	19320	18420	16930	19160	18970	18210	14680	23900	16540	25160	12650	20980	14830	22650	16660	17490	15730	20520	16010	36340
HMDB0000191	http://www.hmdb.ca/metabolites/HMDB00191	Amino acids	C4H7NO4	L-Aspartic acid		RP neg	112819	122056	110202	112666	107321	111268	105585	104880	109324	103242	106264	110000	108683	124451	107964	104677	107202	99980.4	108794	102147	125668	102634	106821	110832	105885	106978	101486	103888	109744	86200.3	136556	179909	89713.2	105215	132387	142906	104593	92476.2	117225	125702	147155	102698	113737
HMDB0000706	http://www.hmdb.ca/metabolites/HMDB00706	Amino acids	C13H16N2O5	L-Aspartyl-L-phenylalanine		RP neg	565.7	528.3	971.5	819.6	1720	1736	1588	1465	1022	1919	1584	1026	1161	1161	1879	1081	822.7	1470	575.9	1130	2366	1390	1179	639.6	797.3	871.8	1042	971	434.7	2030	1498	1246	972.7	1445	1016	1544	1624	688.6	1669	1029	1653	1451	1753
HMDB0000641	http://www.hmdb.ca/metabolites/HMDB00641	Amino acids	C5H10N2O3	L-Glutamine		RP neg	460185	471281	468687	462110	464039	459745	460595	460587	463392	466679	460550	458187	458366	461101	455067	457817	462010	452310	465184	454544	459307	458495	456334	457120	461757	465454	461375	445201	460436	391038	512457	504941	472577	336549	685606	416211	487995	376643	411316	497572	433387	385829	632706
HMDB0000172	http://www.hmdb.ca/metabolites/HMDB00172	Amino acids	C6H13NO2	L-Isoleucine		RP neg	128410	130147	125095	126317	126722	124422	125306	124442	119461	124236	131074	129114	126837	131169	126057	135862	132267	137788	134028	134515	134960	135009	134719	138766	132956	129756	134930	131331	128940	80874.1	131556	116202	161702	102094	123557	151986	104272	104973	78195.7	122690	128571	138845	189898
HMDB0000190	http://www.hmdb.ca/metabolites/HMDB00190	Hydroxy acids	C3H6O3	L-Lactic acid		RP neg	559964	570992	571037	565010	565025	582746	575038	556998	579419	555810	569917	578405	568137	579935	584102	571143	567188	569357	568419	562587	566885	570333	580195	572264	593629	588854	562477	575475	575149	485976	458300	305644	1.05055e+06	547939	642493	575005	414007	439308	494437	697626	571574	468038	539480
HMDB0000687	http://www.hmdb.ca/metabolites/HMDB00687	Amino acids	C6H13NO2	L-Leucine		RP neg	127496	128801	124397	125619	126177	123892	124760	123727	118768	123757	130507	128379	126313	130563	125518	135309	131611	137132	133007	133781	134505	134554	133987	137675	132036	129052	134345	130633	128153	80515.4	130920	115642	160869	102094	122847	151555	103795	104291	77792.2	122164	127905	138299	189091
HMDB0000182	http://www.hmdb.ca/metabolites/HMDB00182	Amino acids	C6H14N2O2	L-Lysine		RP neg	32825.5	34010.8	32655.1	33415.6	35210	34284.8	33492.2	34287.3	31648.5	33393.8	33608.7	34208.3	32780.9	33628.4	32856.7	33785.2	33409.5	33277	32707.8	34315	33969.9	34441.9	32789.6	35257.1	33508.9	34186.9	31264.6	34535.1	34233.1	20137.9	39144.9	31531.7	37306.1	22134.3	34382.2	30502.2	26135.1	27877.1	27620.3	30907.9	31951.3	33726.8	46786.5
HMDB0000696	http://www.hmdb.ca/metabolites/HMDB00696	Amino acids	C5H11NO2S	L-Methionine		RP neg	3769	4340	4592	4635	4595	4424	5010	4218	4182	3981	4236	4449	4368	4184	4301	3904	4429	4092	3723	3970	3764	3943	3627	3191	3638	3653	3737	3769	3696	722.3	3076	4154	1921	2261	4111	3202	3040	1294	2556	2670	2824	3078	5261
HMDB0000159	http://www.hmdb.ca/metabolites/HMDB00159	Amino acids	C9H11NO2	L-Phenylalanine		RP neg	165925	167773	164433	162130	163311	165144	163025	164308	158787	165136	161356	163440	164667	163918	163868	165284	164939	159987	164871	162540	160632	161850	164700	164261	158839	165367	167419	166508	165513	106217	151368	141461	152520	130132	138791	168723	151615	121977	140793	154772	142295	147694	215214
HMDB0062620	http://www.hmdb.ca/metabolites/HMDB62620	Carbohydrates	C4H8O5	L-Threonic Acid		RP neg	84090	77660	78300	78410	78320	74930	72640	72820	73970	73810	78550	74450	71720	74040	72390	78580	65540	64170	68380	70160	74030	72930	74490	62770	59150	60890	58930	66160	57750	34970	77750	69580	57990	76520	36690	36920	44270	32820	58240	53400	81960	69180	71660
HMDB0000167	http://www.hmdb.ca/metabolites/HMDB00167	Amino acids	C4H9NO3	L-Threonine		RP neg	106997	109553	106438	107161	108705	108897	105519	112832	106783	108088	106567	106233	108970	107444	108054	107704	110993	107590	108522	109113	108203	105515	107841	111241	109151	110167	107317	108145	105248	79109.1	91639	104572	87992.8	57078.2	158169	108289	120484	85338.3	90134.7	84111.9	107554	85016	128027
HMDB0000929	http://www.hmdb.ca/metabolites/HMDB00929	Amino acids	C11H12N2O2	L-Tryptophan		RP neg	238237	235642	234695	242453	240067	242687	242189	234192	236255	236025	238282	240691	240676	241377	241175	237081	238793	239107	237928	235537	239566	242924	235148	235900	232514	238324	238804	237310	231547	141427	271272	188084	166912	160429	253162	187304	190826	186865	207070	186857	237581	245179	356523
HMDB0000158	http://www.hmdb.ca/metabolites/HMDB00158	Amino acids	C9H11NO3	L-Tyrosine		RP neg	141087	139104	151162	138996	150340	141053	162532	146881	151029	155695	152082	150272	150090	146809	149015	154209	149818	154094	149082	150445	150850	154780	150101	156750	170985	150605	149417	154849	152556	110822	163059	141830	164822	102872	172557	170485	154287	125343	130869	135785	168790	157231	223394
HMDB0000883	http://www.hmdb.ca/metabolites/HMDB00883	Amino acids	C5H11NO2	L-Valine		RP neg	22867.5	21323.6	23196.8	22078.9	21935.1	20418.4	23438	23541.8	21867.4	22466.3	22979.9	20622.9	21022.6	19801.7	22204.2	21106.7	21379.6	22526.4	22725.3	20056.9	22931.9	21956.4	23282.8	26142.3	20951.3	20753	22020.3	25355	25774.1	12867.9	19093	21725.2	23594.6	14237.8	26739.6	26066	18984.3	21895.8	20731.9	23170.9	24074.4	23906.2	26502.2
HMDB0011505	http://www.hmdb.ca/metabolites/HMDB11505	Glycerophosphoethanolamines	C23H46NO7P	LysoPE(18:1)		RP neg	5242	5284	6660	6583	6938	7283	7135	7366	7266	8026	8040	7657	7471	7817	6648	7256	6026	6563	4640	5556	7484	5653	5212	3834	3709	4431	5314	4534	4765	914.2	4020	4636	4967	1287	1402	1150	5367	6836	10330	6847	6732	8930	4807
HMDB0000156	http://www.hmdb.ca/metabolites/HMDB0000156	Hydroxy acids	C4H6O5	L-Malic acid		RP neg	5041.79	4862.71	4887.61	5078.48	4562.78	5935.89	4990.05	4438.31	4927.78	5237.41	5093.4	5675.07	4430.04	5565.56	4573.46	4593.91	4428.9	4332.4	4932.49	5567.6	5894.67	4431.64	4903.29	4539.81	4691.05	4259.03	5346.7	6017.73	5258.42	4786.24	3476.19	2985.97	6100.76	5406.48	5846.61	4040.23	3905.69	3601.89	4431.73	11820.3	4278.15	4714.95	3448.24
HMDB0001844	http://www.hmdb.ca/metabolites/HMDB01844	Fatty acids	C5H8O4	Methylsuccinic acid		RP neg	319.068	309.483	340.617	326.728	390.558	321.907	330.853	357.714	371.915	389.339	453.228	340.259	385.151	348.143	300.623	430.119	398.097	381.38	353.048	300.01	365.84	476.526	304.358	301.439	436.851	386.455	325.274	311.316	354.166	444.808	580.373	532.909	610.74	457.537	605.328	450.75	476.461	448.827	499.204	512.226	504.199	706.338	572.1
HMDB0003254	http://www.hmdb.ca/metabolites/HMDB03254	Carbohydrates	C9H17NO7	Muramic acid		RP neg	6814	6851	6942	6388	6401	6574	6237	5942	6294	6217	6569	6122	6131	5927	5799	5912	5943	6085	5848	5749	5912	5866	5797	5571	5257	5445	5260	4951	5749	2964	12430	8840	8493	29750	9046	3748	3889	5667	7755	5680	9482	7493	10310
HMDB0000811	https://hmdb.ca/metabolites/HMDB0000811	Bile acids	C24H40O4	Murocholic acid		RP neg	3678	3375	3388	3695	3574	3473	3476	3283	3587	3183	3468	3230	3342	3317	2850	3347	2731	3113	3275	2841	3245	2970	2794	2645	2408	2584	2589	2476	2907	616.1	1078	202.4	1399	1374	217.4	1025	213.1	2994	1933	1523	537.3	2875	7455
HMDB0062645	https://hmdb.ca/metabolites/HMDB0062645	Amino acids	C13H16N2O4	N(2)-phenylacetyl-L-glutaminate		RP neg	70030	72200	76580	72800	78610	70440	73650	68790	66670	69890	64270	67300	67070	69820	65490	63340	62900	62470	69040	64820	67780	58780	69160	66290	61380	65880	56750	58930	56710	73720	37970	122000	17040	163300	76550	91780	59200	24680	46340	237800	29010	5657	22560
HMDB0003357	https://hmdb.ca/metabolites/HMDB0003357	Amino acids	C7H14N2O3	N2-Acetylornithine		RP neg	5135	4930	4881	4993	5091	4443	5157	5219	5177	4662	5124	4948	5165	5328	5463	4817	5795	5081	5384	4996	5345	5526	5439	5799	4897	4953	5121	4819	4367	1990	3500	2963	4365	3741	4755	2856	4448	3196	2669	6132	7392	2283	3048
HMDB0000766	https://hmdb.ca/metabolites/HMDB0000766	Amino acids	C5H9NO3	N-Acetyl-L-alanine		RP neg	2137	2294	2986	2703	2839	2549	2707	2987	2881	2977	3102	3016	3025	3061	2728	2976	3045	2349	3032	3058	2771	2745	2857	2559	2164	2398	2507	2447	2604	1971	2025	2052	2302	3888	2259	1515	2377	1167	2489	3008	3605	2387	1972
HMDB0000812	https://hmdb.ca/metabolites/HMDB0000812	Amino acids	C6H9NO5	N-Acetyl-L-aspartic acid		RP neg	1088	1267	1264	1347	1313	1208	1329	1177	1066	1162	1310	1149	951.2	1161	1271	1291	701.3	987.6	1022	963.1	1055	1285	1131	981.1	955.9	993.9	948.8	1274	1075	1152	995.2	839.9	1288	1551	1431	960	1119	676.7	1270	1142	1156	894.5	1320
PubChem 54571554	https://pubchem.ncbi.nlm.nih.gov/#query=N-Acetyl-L-leucyl-L-proline	Amino acids	C13H22N2O4	N-Acetyl-L-leucyl-L-proline		RP neg	2661	2678	2552	2738	2531	2588	2931	2665	2615	2440	2661	2634	2542	2584	2334	2688	2410	2518	2554	2683	2365	2182	2120	2475	2056	2404	2425	2645	2105	2190	2804	2111	1814	5908	3526	3279	2652	1075	1339	1687	976.3	1654	1209
HMDB0011745	http://www.hmdb.ca/metabolites/HMDB11745	Amino acids	C7H13NO3S	N-Acetyl-L-methionine		RP neg	2501	2635	2945	2754	2913	2812	2548	2689	2442	2638	2634	2459	2576	2752	2666	2528	2526	2222	2373	2361	2410	2428	2428	2583	2295	2550	2494	2190	2270	224.7	269.5	214.6	849.5	475.7	390.3	479.1	622.8	155.7	255.1	356.4	284.8	484.6	712.4
HMDB0000230	http://www.hmdb.ca/metabolites/HMDB00230	Carbohydrates	C11H19NO9	N-Acetylneuraminic acid		RP neg	19720	19320	18180	18970	19430	21120	21030	15640	15770	19050	19850	19790	17430	20380	20890	17890	18210	16560	13670	18760	16740	19430	17390	15320	15430	14660	16290	15360	14810	10160	25160	29010	24630	60080	14790	18180	11500	16010	19170	11900	26030	19690	23430
HMDB0001015	http://www.hmdb.ca/metabolites/HMDB01015	Amino acids	C6H11NO3S	N-Formyl-L-methionine		RP neg	755.7	814.8	771.9	951.5	793.3	964.8	868.6	861.7	1005	1020	777.8	807.1	823.5	979.7	994.9	813.2	827.5	812	722.1	818.2	741.1	812.9	751.5	656.4	899.6	715.6	839.4	430.3	812.3	330.3	778.6	857.2	596.2	800.4	669	441.3	645.1	344.6	559.2	1070	786.7	612.2	829.4
HMDB0062175	https://hmdb.ca/metabolites/HMDB0062175	Amino acids	C12H15NO4	N-lactoyl-Phenylalanine		RP neg	1415	1363	1415	1442	1433	1323	1366	968.8	1201	1346	1337	1392	1239	1356	1290	1337	1393	1394	1066	1235	1148	1197	944.2	1478	1203	1078	1207	1042	1339	977.2	990.7	1006	2270	2573	1085	1078	1518	1483	1748	4474	1757	1435	2672
PubChem 3042313	https://pubchem.ncbi.nlm.nih.gov/compound/3042313	Amino acids	C23H26N4O8	Nocardicin C		RP neg	2278	2080	2382	2150	2291	2186	2475	2595	2293	2409	2547	2009	2508	2218	2064	2160	1918	2060	1888	2009	2078	1813	2110	1682	1659	1842	1824	1792	1610	779.2	2217	2146	1099	3039	1910	1091	2804	1161	2054	2036	2805	1867	2123
HMDB0000224	https://hmdb.ca/metabolites/HMDB0000224	Organic phosphoric acids	C2H8NO4P	O-Phosphoethanolamine		RP neg	1702	2116	1856	1821	2264	2015	2148	2161	2042	2193	2225	2176	1923	2532	2134	1939	2234	1993	2208	2042	1854	2213	1960	1584	2006	1791	2246	2075	2126	954.7	2304	1281	1814	2532	1791	1605	1556	1163	1563	3021	2192	1678	1748
HMDB0000214	http://www.hmdb.ca/metabolites/HMDB00214	Amino acids	C5H12N2O2	Ornithine		RP neg	14910	14830	14850	14960	14910	15020	15140	14790	14340	14730	15160	15070	14150	14350	14300	14340	14680	14250	13690	13750	14120	14300	14110	13300	13660	12880	13540	12960	13460	13990	21530	14270	12520	9980	9882	19160	18530	13150	12630	10100	12320	10430	15870
HMDB0000786	http://www.hmdb.ca/metabolites/HMDB00786	Purines	C5H4N4O2	Oxypurinol		RP neg	27010	29120	31390	32180	34360	37270	39850	44390	48060	49880	57390	56500	59500	59310	60190	57800	52870	53790	54860	55750	55010	55100	55460	51270	44600	45520	46670	47860	46300	12.74	89720	29.97	30.07	31.04	32.16	35.01	28.9	51.31	69.41	35.13	536700	608800	2143
HMDB0000210	http://www.hmdb.ca/metabolites/HMDB00210	Alcohols	C9H17NO5	Pantothenic acid		RP neg	3414	3801	3900	4011	3798	3851	3793	3516	3616	3646	4042	3724	3763	3588	3592	3784	3367	3331	3138	3188	3439	3416	3330	3031	3137	3125	3110	3080	2824	1745	3336	2703	3580	4887	1966	2215	2722	3465	2914	2944	4308	3990	2895
HMDB0011686	https://hmdb.ca/metabolites/HMDB0011686	Carbohydrates	C13H16O7	p-Cresol glucuronide		RP neg	4109	4127	4377	4204	4405	4089	3936	4385	3715	3788	4007	3800	3811	3624	3641	4104	3682	3885	3455	3935	3392	3466	3539	2984	3146	2747	3141	3688	2782	4963	1919	10680	394.9	8461	5917	5759	4103	2635	3491	26010	2417	860.2	713.3
HMDB0000821	https://hmdb.ca/metabolites/HMDB0000821	Amino acids	C10H11NO3	Phenylacetylglycine		RP neg	3548	3135	3564	3411	3517	3399	3554	3041	3098	3489	3128	3378	2941	3087	3342	3074	2831	2992	2614	3401	2819	2704	3053	2534	2049	2519	2637	2557	2275	800.4	841	642.3	542.4	994.5	81.09	1058	848.4	780.7	1161	634	1043	1088	1293
HMDB0028991	https://hmdb.ca/metabolites/HMDB0028991	Amino acids	C13H16N2O5	Phenylalanylaspartic acid		RP neg	711.9	603.3	656.4	668.5	707.1	881	681.4	856.9	578.6	518.7	715.6	692	752.6	670.7	612.5	885.5	690.8	743.1	511.4	694.1	834.3	754.2	914.9	565.6	455.9	653.4	453.4	802	434.3	921.1	262.4	4211	262	1885	704.2	1067	413.9	180.7	278.8	777.6	678.4	263.4	189.9
HMDB0029006	https://hmdb.ca/metabolites/HMDB0029006	Amino acids	C20H21N3O3	Phenylalanyltryptophan		RP neg	715.9	564	593.5	613.4	726.5	551.3	662.5	662.1	674.2	532.7	538	685.5	506.6	584.7	533.2	620.7	631.9	524.4	651.4	568.7	570.3	557.8	515	546.3	363.8	586.6	569.5	523	337.3	459.4	687.1	526.6	518.3	918.8	437.9	500.5	470.7	294.7	429.3	169.3	519.9	737.6	520.4
METLIN 65793		Glycosides	C12H16O6	Phenylgalactoside		RP neg	135600	138900	143800	140900	145900	151900	144900	141400	140800	143800	145300	138100	135700	141500	136200	138500	127900	132400	131900	128400	138000	130000	129300	127000	114700	120000	120500	117900	115400	50880	149300	145900	39020	15510	222300	187900	113100	297200	18310	49340	53270	245400	121400
HMDB0000205	https://hmdb.ca/metabolites/HMDB0000205	Phenylpyruvic acid	C9H8O3	Phenylpyruvic acid		RP neg	2084	2234	2480	2147	2425	2272	1988	2273	2854	2667	2246	2079	2300	2692	2495	2044	2117	1895	1733	1937	1935	2405	1812	1973	1608	1769	1729	1970	1975	800.4	2162	1494	1284	1573	3241	3320	1094	2833	1187	3349	4821	3905	2226
HMDB0000020	https://hmdb.ca/metabolites/HMDB0000020	Phenols	C8H8O3	p-Hydroxyphenylacetic acid		RP neg	1758	1624	1929	1594	1847	2536	2225	1727	2062	2169	1990	2134	2194	1800	2153	2130	1922	1588	1249	1669	1976	1774	2241	1492	1530	1289	2077	1640	986.6	130.8	124.1	166.5	1107	187.5	167.3	173.3	116.2	282.5	4925	512	62.56	98.9	429.2
HMDB0000245	https://hmdb.ca/metabolites/HMDB0000245	Amines	C10H14N2O4	Porphobilinogen		RP neg	898.3	1032	1076	1069	1132	1002	1212	609.4	1127	969.2	725.2	810.2	1054	1176	1205	931.7	1036	886.9	779.3	1139	1101	694	905.7	983.1	911.7	1044	818.9	959.9	985.7	497.8	668.8	571.9	790.1	1958	668.4	1225	1007	604.3	732	1015	1064	658.7	1383
HMDB0240590	https://hmdb.ca/metabolites/HMDB0240590	Sulfated steroids	C21H34O5S	Pregnanolone sulfate		RP neg	238.2	476.2	544.3	388.9	221.6	445.7	255.4	754.5	416.6	288.6	357.3	580	352.4	299.3	753.3	410.2	217.3	190.2	474.7	316.9	1104	379.3	216.6	375.9	317.2	249.8	273	193.4	327.5	414.9	678.4	229.5	461	237.8	290.8	288.1	235.9	244.8	504.3	439.9	543.8	530.5	311.7
METLIN 207476		Amino acids	C28H36N4O7	Pro Tyr Tyr Val		RP neg	7070	6349	8976	7932	8525	8365	8853	8017	7562	7976	8135	7564	7552	7852	7237	7563	7155	7183	5845	7169	7308	7075	6611	5634	5867	6475	6284	6196	5622	2645	6004	4468	10140	13620	3556	8309	5127	2630	5885	5844	5658	7682	2870
HMDB0000767	http://www.hmdb.ca/metabolites/HMDB00767	Nucleosides	C9H12N2O6	Pseudouridine		RP neg	18870	18430	19840	19210	19920	21020	19260	19250	19140	18890	19670	18280	18030	18420	19210	18480	18120	18640	17690	18150	19260	18210	18550	17370	17280	17280	17910	17330	16940	10260	14060	12450	16060	31880	15120	15260	18080	13030	12910	18130	22700	14840	13180
HMDB0000267	http://www.hmdb.ca/metabolites/HMDB00267	Amino acids	C5H7NO3	Pyroglutamic acid		RP neg	152600	159800	165200	160000	163900	164100	162200	159600	158100	161500	162700	157400	158700	156500	151500	155600	149500	147200	148400	151500	156200	149700	150400	145500	124600	142200	134700	137900	139800	144600	149500	175800	181100	136600	148300	159200	169700	132100	127600	161300	151500	123500	176000
HMDB0000250	https://hmdb.ca/metabolites/HMDB0000250	Non-metal pyrophosphates	H4O7P2	Pyrophosphate		RP neg	16340	9853	8566	6432	6113	6937	5479	5679	4730	4494	4351	4153	3952	4335	3492	3080	2773	2491	2611	2509	2598	1824	2288	2273	1865	1967	1729	1615	1697	500.7	7165	4130	2613	2963	1230	2719	5673	569.5	1890	9440	6424	1744	8080
HMDB0000884	http://www.hmdb.ca/metabolites/HMDB00884	Pyrimidine nucleosides	C10H14N2O6	Ribothymidine		RP neg	1375	1226	1404	1278	1253	1099	1414	1020	1311	1655	1443	1313	1388	1398	1322	1475	1423	1447	1227	1172	1377	1383	1671	1346	1208	1406	1204	1366	1138	1390	898.5	1063	1347	1101	1429	903.2	1131	1319	1287	1056	1347	1451	1660
HMDB0000271	http://www.hmdb.ca/metabolites/HMDB00271	Amino acids	C3H7NO2	Sarcosine		RP neg	17379.1	17816.3	18582.7	17014.7	16753	16100.2	16389	17132	15399.9	17109.7	19754.6	16928.7	15710.1	16469.7	16767.7	16613.2	16394.6	16498.2	16641.6	16149	16731.4	16036.4	16022.2	10935.6	20747.5	13613.6	11748.5	14843	15425.9	10752.4	22913.6	23963.3	21417.9	15049.2	14947	16901.5	10682.4	19056	13877.5	15698.9	20978.4	17500.2	25115.3
HMDB0000277	http://www.hmdb.ca/metabolites/HMDB00277	Phosphosphingolipids	C18H38NO5P	Sphingosine 1-phosphate		RP neg	9734	9032	10400	10040	10440	10800	10770	10510	10660	10280	9531	8647	8543	9353	9017	7807	7400	7279	6865	7534	6672	6688	6391	6201	6579	6348	5879	6599	5855	1532	7283	5021	4637	1869	2701	1990	4047	3164	6918	7386	5640	4850	4449
HMDB0060061	http://www.hmdb.ca/metabolites/HMDB60061	Organic phosphoric acids	C16H34NO5P	Sphingosine 1-phosphate (d16:1-P)		RP neg	2359	2003	2042	2068	1811	1956	1911	1972	1951	1814	2049	1538	1827	1980	1864	1390	1612	1499	1466	1774	1707	1485	1327	984.6	1231	1291	1367	1319	1125	848.9	2248	1091	1140	902.5	1157	883.6	1015	827.4	1896	1396	1842	1092	1178
HMDB0000254	http://www.hmdb.ca/metabolites/HMDB00254	Carboxylic acids	C4H6O4	Succinic acid		RP neg	12391.1	12380.3	13744.3	13621.7	15805.1	13659.9	14090.7	15312.9	14346	14487.5	13115.7	14446.1	14350.5	13215.1	13803.2	13856.1	13477.4	13892.2	12710.4	13926.3	13975	14761	12427.3	13162.1	14588.1	14415.1	14275.4	14874.1	12826	11774.2	13966.2	12748.6	20297.4	16609.1	15563.9	13339.1	11850.1	9716.63	12907.4	15584.6	15997.4	15313.9	12442.3
HMDB0000251	https://hmdb.ca/metabolites/HMDB0000251	Amino acids	C2H7NO3S	Taurine		RP neg	152071	147375	154391	149164	154645	152330	151863	155557	152503	155307	158808	154997	153228	155873	158478	154513	153803	156451	148188	152648	154272	155124	156058	151224	151932	154510	157502	156730	150015	101541	156766	106608	179911	176903	154836	115434	127119	109271	136867	138397	157599	162581	130040
HMDB0010357	https://hmdb.ca/metabolites/HMDB0010357	Steroidal glycosides	C27H40O11	Tetrahydroaldosterone-3-glucuronide		RP neg	2004	1960	2385	1778	2198	1994	2234	1823	1850	1583	1794	1508	1616	2005	1489	1438	1270	1782	1274	1232	1288	1169	1358	1358	1003	1394	1078	1337	900	425.8	934.5	1235	196.7	679.7	323.8	460.1	7334	3778	264.9	375.5	330.6	1007	2004
HMDB0001889	http://www.hmdb.ca/metabolites/HMDB01889	Purines	C7H8N4O2	Theophylline		RP neg	12840	14590	15170	14020	13650	11270	10830	10120	10260	10990	11060	10350	9231	10530	9348	9513	8893	8715	8641	9506	9433	9251	9366	8024	7639	7585	8198	7862	8208	43.18	7904	3310	1766	11840	4247	4145	1822	9232	10490	3917	14090	844.6	3485
METLIN 235463		Amino acids	C28H38N4O7	Thr Leu Tyr Phe		RP neg	6637	6288	7778	7514	7601	6425	7296	7108	7114	6888	6789	6883	6682	6634	6479	6862	6724	6100	5630	6108	6294	6145	6469	5917	6075	5735	6028	5210	5311	3838	4490	4515	6165	18760	1399	7390	6881	2994	3430	4466	3479	6217	4337
HMDB0240296	https://hmdb.ca/metabolites/HMDB0240296	Indolyl carboxylic acids	C17H22N2O7	Tryptophan 2-C-mannoside		RP neg	1464	1354	1425	1388	1564	1408	1287	1529	1329	1349	1367	1166	1309	1362	1307	1063	1351	1265	1264	1336	1445	1355	1312	1125	1173	1151	1263	1365	1320	745.9	1118	862.9	987.8	2243	913.9	1171	1091	786	861.4	1556	1732	851.1	734.2
HMDB0029104	http://www.hmdb.ca/metabolites/HMDB29104	Amino acids	C14H18N2O6	Tyrosyl-Glutamate		RP neg	2399	2604	2501	3222	2400	3408	2604	2545	2557	2665	2512	2127	2070	2213	2595	2584	3017	2625	2007	1992	2648	2950	2734	2176	2469	2162	2303	2152	2230	1760	2094	2203	2285	1973	1944	3315	2353	1685	1700	2190	2833	1853	3092
		Sulfated steroids	C19H37O5S	Unknown sulfated steroids		RP neg	4915	5152	5319	5683	5196	5698	5857	5172	4801	5420	4857	5472	5196	5037	4753	5337	4378	4193	4141	3891	4378	4030	3817	2673	3061	3730	3388	3282	3301	1598	4454	2556	3049	2681	2461	3031	2871	2368	5095	5834	3066	2931	3528
HMDB0000289	http://www.hmdb.ca/metabolites/HMDB00289	Purines	C5H4N4O3	Uric acid		RP neg	1.48417e+06	1.47575e+06	1.47221e+06	1.47878e+06	1.46788e+06	1.46902e+06	1.4899e+06	1.476e+06	1.48518e+06	1.4655e+06	1.4685e+06	1.46882e+06	1.45153e+06	1.48582e+06	1.47757e+06	1.47498e+06	1.4615e+06	1.46721e+06	1.48194e+06	1.48755e+06	1.47183e+06	1.47815e+06	1.48606e+06	1.48591e+06	1.47316e+06	1.48079e+06	1.4888e+06	1.48565e+06	1.49281e+06	735123	1.47118e+06	1.3992e+06	1.48757e+06	1.4224e+06	1.30204e+06	1.08335e+06	1.63322e+06	746066	1.29634e+06	1.61279e+06	1.61053e+06	1.45591e+06	1.10561e+06
HMDB0000296	http://www.hmdb.ca/metabolites/HMDB00296	Pyrimidine nucleosides	C9H12N2O6	Uridine		RP neg	21445.1	22264.2	21506.8	22226.5	21548.6	22045.4	21560.8	22308.6	21642.5	21070.2	20636.2	21514.4	20962.1	20819.5	22691.5	20606.3	20723	19972.8	19609.4	21006.5	22560.3	20434.7	21626.2	19936	19700.5	18939.9	19080.5	19265	18892.7	16844.4	25923.7	15609.7	30525.4	12464.4	20276.6	18500.2	12849.2	12995.7	18208.8	18757.8	8.88667	17558.4	11084.5
HMDB0000292	http://www.hmdb.ca/metabolites/HMDB00292	Purines	C5H4N4O2	Xanthine		RP neg	8025.25	8392.54	7859.7	7943.06	7940.62	8052.92	8149.85	8216.88	8444.83	7766.7	8054.19	8114.22	8321.92	7675.43	7891.47	8113.15	7878.82	8238.54	8231.91	7897.16	8151.37	8480.31	8333.73	8062	8190.04	8148.55	8114.71	8745.48	8360.54	4375.89	5213.78	3804.93	17217.7	4288.23	5377.13	9167.69	3589.32	4977.92	3271.57	4651.74	26728	23227.2	4776.75
HMDB0014698	http://www.hmdb.ca/metabolites/HMDB14698	Carboxylic acids	C12H20N4O7	Zanamivir		RP neg	2759	2671	2898	3212	2709	3367	3063	2878	3131	3112	2879	2643	2555	2760	3114	2965	3060	2685	2346	2649	3037	2618	2573	2291	2433	2593	2657	2352	2252	458.2	1412	2252	991.3	544.9	728.7	1327	1033	910	965.3	1566	900.2	822.3	1629
HMDB0006029	https://hmdb.ca/metabolites/HMDB0006029	Amino acids	C7H12N2O4	N-Acetylglutamine		RP pos	52520	57460	58710	59150	61990	61610	65080	67460	68490	67080	65640	66120	69890	74550	77360	77010	79930	78310	81480	78860	78750	76160	79070	77670	76940	74410	71610	78810	76160	63190	65050	100600	81420	76570	120400	117000	97420	89270	87110	77930	100000	98440	58890
HMDB0062735	https://hmdb.ca/metabolites/HMDB0062735	Acyl carnitines	C11H21NO5	(R)-3-hydroxybutyrylcarnitine		RP pos	1557	1808	1753	1622	1827	2170	1962	2065	2194	2281	2223	2392	2139	2165	2233	2397	2239	2706	2400	2262	2554	2562	2354	2497	2333	2321	2130	2253	2301	269.2	2375	1564	1708	4456	1406	2066	1322	790	720.8	4373	2238	2305	586.3
HMDB0011648	http://www.hmdb.ca/metabolites/HMDB11648	Carbohydrates	C11H16N2O5	1-(beta-D-Ribofuranosyl)-1,4-dihydronicotinamide		RP pos	1948	1912	1843	2128	2188	2620	2333	2933	2402	2209	2166	2599	1738	1876	2120	1820	1720	1620	2184	1833	1959	1747	2222	1655	1975	1862	1989	1984	2242	786.4	1559	1849	1372	2905	1523	1560	1949	1259	1960	2769	2431	1450	1426
HMDB0127524	https://hmdb.ca/metabolites/HMDB0127524	Prenol lipids	C27H44N2O6S	HMDB0127524		RP pos	1095	821.9	977.2	922.3	942.5	884.6	1139	815.4	781.1	782.7	811.8	894.8	793.6	1109	1081	1347	1131	1143	1052	1051	1096	1501	1344	1312	1290	1218	1075	1100	1142	31.93	469.7	355.1	816.9	74.2	175	113.9	452.3	2556	1279	887.3	739.4	1306	122
PubChem 71367139	https://pubchem.ncbi.nlm.nih.gov/compound/71367139	Amino acids	C8H12N2O5	1-Carboxy-L-prolylglycine		RP pos	242800	251700	266000	269500	275100	285800	291300	300800	296200	290700	304500	307800	293900	327400	349900	345300	354800	344100	348000	356700	360000	340900	356900	352000	339700	332300	320500	333700	337600	287800	296200	474500	353400	332000	540600	533700	418500	415700	404200	359600	442800	461800	255800
HMDB03331	http://www.hmdb.ca/metabolites/HMDB03331	Purine nucleosides	C11H15N5O4	1-Methyladenosine		RP pos	5014	5367	5479	5381	5518	5577	5703	6337	6094	6106	6660	6593	6301	6477	6500	6847	7138	6580	6331	6681	6724	6173	6137	5960	6091	6420	6302	6164	6318	4898	6014	4302	7524	10460	6496	6000	7629	6841	6693	7499	8142	7780	7019
HMDB0003282	http://www.hmdb.ca/metabolites/HMDB03282	Purines	C6H7N5O	1-Methylguanine		RP pos	1571	1495	1394	1719	1781	1852	1898	2152	2087	2383	1936	2174	2320	2538	2699	3057	3092	3206	3349	3122	3320	2928	3139	2738	2829	3146	3222	3012	3472	1389	984.5	1588	2220	2622	2695	1731	2441	1838	1727	2088	1673	2124	2540
HMDB0001563	http://www.hmdb.ca/metabolites/HMDB01563	Purine nucleosides	C11H15N5O5	1-Methylguanosine		RP pos	854.3	880.1	897.5	865.2	1013	902	1249	1016	1021	885.6	977.6	1039	712.3	790.6	895	811.3	716.8	943	507.2	736.3	630.6	714.1	787.6	540	699.6	834	724.4	759.1	744.5	408	733.7	822.7	712.8	565.2	558	964	505.5	503.5	624.5	752.7	1477	648.7	253.1
HMDB0000001	https://hmdb.ca/metabolites/HMDB0000001	Amino acids	C7H11N3O2	1-Methylhistidine		RP pos	4098	4065	4285	5628	5133	5462	5355	6356	6716	6490	6859	7118	9674	10350	9954	11700	12550	11540	13000	11400	10890	13480	12670	12130	13420	12090	13090	12850	14220	2035	5365	2947	6184	8097	9442	4224	7347	5233	5634	5296	9376	10740	6911
HMDB0002721	https://hmdb.ca/metabolites/HMDB0002721	Purine nucleosides	C11H14N4O5	1-Methylinosine		RP pos	1412	1361	1493	1335	1619	1653	1615	1608	1852	1672	1911	2344	1319	1195	1358	1391	1260	1274	1216	1386	1320	981.8	1244	1044	1292	1189	1225	1268	1228	1060	1013	1700	836.2	2282	1047	1713	1500	958	1455	1474	2093	959.1	866.7
PubChem 1005-24-9	https://pubchem.ncbi.nlm.nih.gov/compound/70495	Pyridines	C7H9ClN2O	1-methylnicotinamide		RP pos	131700	136100	136800	140200	145100	142200	147800	127900	124400	123800	127500	133100	136600	143200	148300	149800	153900	151000	155100	151900	152900	150700	145200	138300	141800	132000	136200	143500	140900	109700	154200	145300	180600	128100	161300	121400	131100	129000	154200	147300	131200	185000	190700
HMDB0012497	https://hmdb.ca/metabolites/HMDB0012497	Pyrrolines	C4H7N	1-Pyrroline		RP pos	20720	21470	22970	23680	25330	23560	26240	30180	29730	28890	29370	29960	33740	38440	38610	47180	46950	48690	49050	50540	51380	48500	53710	51660	47640	48850	46650	50530	49510	14990	20470	28620	50970	34760	47770	22550	24110	54100	20280	33630	27670	28500	78690
HMDB29644	http://www.hmdb.ca/metabolites/HMDB29644	Organooxygen	C8H8O4	2',4',6'-Trihydroxyacetophenone		RP pos	1156	977.8	773.4	1579	1430	1628	1528	2257	2737	2252	2496	2921	2315	3402	3457	4203	4431	4843	4692	4377	4776	4851	4829	4126	4440	4221	4142	3960	4479	426.5	560.7	507.5	630.9	319.9	993.3	256.9	5829	350.6	2123	398.1	280.5	568.5	244.1
HMDB0006320	https://hmdb.ca/metabolites/HMDB0006320	Acyl carnitines	C16H31NO4	2,6 Dimethylheptanoyl carnitine		RP pos	636	727.1	845.8	632.1	844.4	842.1	1156	1076	1042	1295	1179	1039	1198	1152	1023	830	651.4	842.8	998.6	1185	1123	921.7	969	1082	859.1	693.7	1035	1119	1044	690.8	1055	982.9	538.7	1013	1109	1376	692	695.1	178.1	1388	1491	861.9	543.5
HMDB0012327	https://hmdb.ca/metabolites/HMDB0012327	Carbohydrates	C6H12O5	2-Deoxygalactopyranose		RP pos	2788	2100	1927	2003	2122	2017	2400	2419	2372	2368	1803	2323	2295	2774	2795	3646	3104	3811	3680	3000	3656	3389	4180	3994	3021	3200	3226	3344	3587	730.4	677.7	1890	2029	566.8	4383	489.3	3772	1121	3935	1676	3781	3015	6687
HMDB0133182	https://hmdb.ca/metabolites/HMDB0133182	Phenylpropanoic acids	C14H18O4	HMDB0133182		RP pos	44170	46980	48590	46790	50550	50140	49370	51300	54820	52210	57950	55480	55340	54270	54370	59350	56660	57720	54800	60390	57900	54720	56450	59540	54440	53860	54110	56590	56880	15430	52750	47060	55970	56280	93790	71630	28550	60860	27200	47490	58810	53830	63330
HMDB0005862	https://hmdb.ca/metabolites/HMDB0005862	Purine nucleosides	C11H15N5O5	2-Methylguanosine		RP pos	1316	1510	1139	1101	1459	1303	1427	1448	1479	1367	1374	1241	992.1	890	1046	1145	936.6	1098	915	875.6	873.3	1003	1023	780.9	1146	978	1196	1136	992.7	740.5	948.2	1167	1052	888.4	914.1	1664	679.7	954.2	945.2	960.6	1915	1083	501.5
HMDB0031682	https://hmdb.ca/metabolites/HMDB0031682	Azolidines	C4H9NS	2-Methylthiazolidine		RP pos	2274	2473	2616	2610	3009	2816	3289	3411	3149	3681	3735	3598	3662	4859	4918	5058	5590	5496	5762	5075	5351	5155	5728	5207	4763	5557	5447	5381	5145	738.5	1994	3093	4047	1991	6232	1923	2612	1961	2119	2618	2614	3678	6867
HMDB0013324	http://www.hmdb.ca/metabolites/HMDB13324	Acyl carnitines	C15H27NO4	2-Octenoylcarnitine		RP pos	1133	812.1	990	1103	1130	1145	1382	1398	1416	1579	1936	2331	1687	1939	2047	1900	1653	1270	1210	1624	2022	1645	1487	1821	1842	1457	59.81	1396	1606	2258	1785	1911	1709	3088	2807	1772	2868	671.1	1007	1426	863.7	646.2	1439
HMDB0011749	https://hmdb.ca/metabolites/HMDB0011749	Piperidines	C5H9NO	2-Piperidinone		RP pos	3603	3848	4564	4860	5204	5927	5650	7186	7837	6861	7864	8577	7884	9523	9627	11160	11460	12410	11340	10950	12190	10200	11430	12010	11660	10650	10800	10980	11550	2373	1867	2895	600.5	1411	3763	1571	7440	19720	2551	1010	3881	4656	12940
HMDB13331	http://www.hmdb.ca/metabolites/HMDB13331	Acyl carnitines	C21H37NO4	3, 5-Tetradecadiencarnitine		RP pos	3513	3859	4102	3872	4217	4337	4269	4583	4855	4412	5139	4838	5184	4547	3898	4660	4258	4178	4524	4652	4277	3761	4214	4003	4004	4318	4187	4435	4760	1289	2310	4662	1797	4594	2705	3016	4427	2040	925.3	3393	3967	3544	1240
HMDB0061636	https://hmdb.ca/metabolites/HMDB0061636	Acyl carnitines	C17H33NO5	3-hydroxydecanoyl carnitine		RP pos	3986	4138	4706	4688	5250	5165	5033	5475	6732	6260	6543	6716	6629	5910	5672	6387	6070	5800	6104	6668	6631	6125	5993	5771	6093	5847	6487	6875	7219	3434	5754	6889	4684	13820	10120	9582	7582	2251	1483	8439	7914	6755	3143
HMDB0061638	https://hmdb.ca/metabolites/HMDB0061638	Acyl carnitines	C19H37NO5	3-hydroxydodecanoyl carnitine		RP pos	1366	1546	1660	1776	1583	1684	1564	1595	1640	1914	1994	1820	1829	1729	1451	1563	1516	1488	1532	1789	1463	1643	1504	1118	1461	1800	1691	1686	1427	720.5	1649	2017	987.1	2632	1446	1820	1531	677.2	190.1	4143	1780	1266	449.5
HMDB0061189	https://hmdb.ca/metabolites/HMDB0061189	Acyl carnitines	C12H23NO5	3-Hydroxyisovalerylcarnitine		RP pos	2608	3083	2735	3247	2984	3020	2604	3261	3601	3649	3358	3602	3342	3345	2656	3039	2716	3024	2658	2718	2879	2622	2630	2416	2751	2882	2486	2644	2870	1781	4668	2024	2538	2039	2883	2474	2237	2108	1760	17790	4665	7725	3950
HMDB0061634	http://www.hmdb.ca/metabolites/HMDB61634	Acyl carnitines	C15H29NO5	3-hydroxyoctanoyl carnitine		RP pos	14900	15910	15770	14880	15440	16680	15970	16050	16290	15680	17600	16890	15620	15150	13990	14950	13570	13970	13630	14280	13730	14230	14450	13500	14470	14260	14660	15410	14330	5557	14540	15960	9610	24670	17040	22420	17890	4529	3783	16920	13890	11430	7884
HMDB0000552	https://hmdb.ca/metabolites/HMDB0000552	Acyl carnitine	C13H23NO6	3-Methylglutarylcarnitine		RP pos	2427	2720	2258	2295	1992	1970	2129	1880	1847	2180	1767	1756	1169	1230	890.2	991	1010	1221	948.1	1127	1238	971.1	1144	1045	1281	842.6	921.8	1001	622.1	496.7	4452	2697	376.2	1406	1170	4035	2030	1471	650.1	3111	2213	978	553.7
HMDB01538	http://www.hmdb.ca/metabolites/HMDB01538	Pyridines	C7H7NO2	3-Pyridylacetic acid		RP pos	5082	5251	5750	5453	6213	6021	6309	7570	8040	7527	7939	7331	8807	9227	9811	10130	10590	10710	10460	9926	10150	10140	9769	9922	10060	9948	9759	10740	10870	4128	3861	4730	6564	8379	14960	4926	9158	11090	4928	3184	9362	5481	15220
HMDB0003464	http://www.hmdb.ca/metabolites/HMDB03464	Amino acids	C5H11N3O2	4-Guanidinobutanoic acid		RP pos	1331	958.6	1140	1239	1255	1242	1432	1547	2052	2084	1605	1763	1526	2101	2150	2352	2235	2075	2274	2477	2071	1825	2054	1133	1948	2137	2503	2499	2321	1062	882.8	959.8	1277	1783	1621	1300	1379	1783	1300	1164	1565	1944	2589
HMDB0000725	https://hmdb.ca/metabolites/HMDB0000725	Amino acids	C5H9NO3	4-Hydroxyproline		RP pos	14160	15120	16810	18080	19600	19170	20160	23080	22850	22850	24250	24880	26320	30870	31200	34200	36410	36720	37910	36350	37960	37400	39850	38520	37750	35060	35390	32630	36610	15420	20690	8929	22420	35280	32390	28980	18910	41320	13470	16140	22410	34860	29830
HMDB0001173	https://hmdb.ca/metabolites/HMDB0001173	Nucleosides	C11H15N5O3S	5'-Methylthioadenosine		RP pos	5903	5881	6273	6028	6102	6638	5832	4832	5043	5211	4785	4521	4444	3420	2506	3105	3123	2900	3547	2941	2816	2949	2310	2660	2438	2683	2015	2446	2623	2413	7307	4160	2084	3620	1138	4406	3942	1832	3516	4239	4415	2156	2667
HMDB0013205	http://www.hmdb.ca/metabolites/HMDB13205	Acyl carnitines	C17H31NO4	9-Decenoylcarnitine		RP pos	5365	6215	5956	6507	6650	7269	7295	6459	7494	7747	7920	8667	7815	7161	6903	7089	7713	6707	7602	6836	7503	7469	6831	6972	7225	6734	7436	7413	7639	3062	7843	6465	4469	12280	7375	8180	12420	4804	1391	7240	7381	8111	3064
HMDB0001859	https://hmdb.ca/metabolites/HMDB0001859	Phenols	C8H9NO2	Acetaminophen		RP pos	7646	7248	7766	7445	7757	7300	8067	8974	8274	8194	7664	8388	8056	8718	8374	9002	9498	9323	10380	10130	11240	9741	10210	10120	9820	8332	9108	9171	8950	15370	357.2	445.4	364.9	400.6	291.3	461	622.9	566.8	739.3	135.1	597.3	368.2	150.1
HMDB0000895	https://hmdb.ca/metabolites/HMDB0000895	Quaternary ammonium salts	C7H15NO2	Acetylcholine		RP pos	10130	11040	12310	12220	12980	13870	14870	17040	17860	17660	18160	18070	18150	19380	17950	18610	18620	18260	18040	17800	17760	19470	18800	18880	20240	17100	16490	18610	18100	8382	10520	22390	15190	21400	26810	14560	16590	13760	14230	8349	20260	18010	24810
HMDB0000050	http://www.hmdb.ca/metabolites/HMDB00050	Purine nucleosides	C10H13N5O4	Adenosine		RP pos	3323	4568	4322	4510	4701	4231	5671	3555	4489	3539	3304	4440	3586	3094	2980	2350	2601	2915	3085	2775	2382	2625	2453	2682	2515	2370	3323	2718	2749	4246	5634	3498	4185	3788	2651	5474	4035	2617	3888	3551	5776	3249	3377
HMDB0014581	http://www.hmdb.ca/metabolites/HMDB14581	Purines	C5H4N4O	Allopurinol		RP pos	1021	1074	1270	1863	1765	1577	1698	1713	2070	1784	1949	1945	1783	1853	2103	1759	2009	2080	1978	2115	1670	1840	2116	1913	2204	2066	2368	2230	1550	1459	1156	1153	2937	972.2	2307	4593	1071	51400	1137	1692	1456	1082	1588
HMDB30091	http://www.hmdb.ca/metabolites/HMDB30091	Carbohydrates	C6H13NO5	beta-D-Glucosamine		RP pos	53400	61410	64850	67700	65880	79150	74750	72280	98510	97900	96520	97910	85090	84000	95920	83700	85210	79220	73560	74530	61790	64210	57590	57680	65290	73530	78940	82170	81890	71260	72620	106000	92080	175700	73810	70860	54010	53660	82880	42570	80280	96510	77680
HMDB0000043	http://www.hmdb.ca/metabolites/HMDB00043	Amino acids	C5H11NO2	Betaine		RP pos	214339	213916	216093	213548	214832	215954	216440	214388	215574	216485	217638	213011	212484	211109	211445	212814	212718	214338	212056	213419	211164	211489	209992	213217	211616	212179	213430	214528	212477	98271.6	199571	177439	165781	156882	220641	161457	235310	199127	145944	198814	152541	123414	531425
HMDB01008	http://www.hmdb.ca/metabolites/HMDB01008	Tetrapyrroles	C33H34N4O6	Biliverdin		RP pos	10530	10520	9817	10310	10500	9608	10610	10250	10770	10670	10760	10320	10060	9983	9442	8915	9273	9490	8558	8395	8973	9261	8950	8149	9481	8628	8931	8496	9093	2154	3902	7491	2821	637.4	3852	3707	6553	12440	6701	8227	3716	4868	9084
HMDB0002013	http://www.hmdb.ca/metabolites/HMDB02013	Acyl carnitines	C11H21NO4	Butyrylcarnitine		RP pos	4825	4984	5143	5072	5323	5539	4827	5442	5862	5313	4813	5268	5207	5255	4836	5724	4578	4131	4244	4749	4001	4029	4150	4250	3886	4425	3904	4239	4981	1531	3600	3134	4548	7461	6316	2924	4505	3875	3544	5818	11360	4009	3788
		Acyl carnitine	C20H39NO4	C13:0 Carnitine		RP pos	5282	5388	5328	5636	6407	6278	6354	6833	6757	6837	6989	5647	6755	6818	5783	6314	6149	6397	6652	5590	6277	5713	5782	5688	5537	6176	6028	6963	6446	2765	9743	11140	2203	3496	6854	8051	5347	8758	1180	9461	6812	6257	9721
HMDB0001847	https://hmdb.ca/metabolites/HMDB0001847	Purines	C8H10N4O2	Caffeine		RP pos	70850	78460	86010	92410	79960	91040	90060	108900	118900	103500	115200	123800	109300	112300	117400	123300	128700	144700	136900	127900	125300	141700	129100	123200	125700	116000	110200	109500	104100	97120	85730	106700	107200	111400	107000	91110	94750	160600	125300	83640	125800	100200	129400
HMDB0000097	http://www.hmdb.ca/metabolites/HMDB00097	Quaternary ammonium salts	C5H13NO	Choline		RP pos	72438.6	70795.6	71373.5	71797.2	70629.1	68944.5	69061.6	68404.8	67952.8	68314.3	68004.1	67248.1	66820.6	65173.9	67172	64883.8	66057.4	66999.6	65505.5	66914.2	68005.2	66158.2	66986.5	67173.3	66451.5	68010.2	66651.9	67223.7	65999	47754.4	66179.2	52037.8	73155.2	77493.3	79623.9	46020.6	68780.5	58496.3	52273.7	97408.3	64989.6	38907.4	84608.2
HMDB0240585	https://hmdb.ca/metabolites/HMDB0240585	Acyl carnitines	C17H31NO4	cis-4-Decenoylcarnitine		RP pos	5350	6207	5943	6502	6622	7250	7294	6420	7475	7720	7884	8662	7796	7105	6909	7082	7697	6683	7575	6822	7501	7482	6786	6954	7196	6698	7412	7385	7620	3059	7822	6443	4451	12260	7302	8151	12400	4801	1399	7214	7371	8070	3066
HMDB0002014	https://hmdb.ca/metabolites/HMDB0002014	Acyl carnitines	C21H39NO4	cis-5-Tetradecenoylcarnitine		RP pos	5666	5634	5864	5781	6199	6486	6157	6689	6644	6870	7260	6948	6366	5957	5962	6204	5960	5514	6316	6325	5845	5714	5258	6049	5918	5228	5843	6684	6207	1191	3617	7256	3186	4179	1910	2835	4038	2851	1194	5595	5159	4697	1257
HMDB0000064	https://hmdb.ca/metabolites/HMDB0000064	Amino acids	C4H9N3O2	Creatine		RP pos	119839	116608	116523	115147	115445	119631	118340	115477	116707	114432	115656	111845	113425	112206	116934	117796	116266	115187	113300	116364	117132	117292	113903	113694	114638	113892	113906	114751	112575	73717.1	166632	120058	172601	47657.9	58417.8	107445	37712.6	142478	79199	80040.3	148724	148583	177044
HMDB0000562	http://www.hmdb.ca/metabolites/HMDB00562	Amino acids	C4H7N3O	Creatinine		RP pos	166669	163612	160588	160046	157855	153845	163159	156378	163713	162199	156457	156697	163102	154623	164843	161518	159296	161618	158740	161877	163929	162305	160783	163403	161233	160999	161530	162210	155983	72546.1	112237	124935	114333	225032	180255	131646	142101	117838	112170	148650	186292	147282	162864
HMDB0000630	http://www.hmdb.ca/metabolites/HMDB00630	Pyrimidines	C4H5N3O	Cytosine		RP pos	32810	37810	37320	38700	41750	47150	44090	42520	51430	51710	52720	52330	49100	53860	58790	56890	55890	57510	54540	53350	47860	40810	39290	34420	42760	42010	40490	40740	41890	50900	45060	48910	52030	49220	42180	38520	46290	50060	47770	39730	48160	57640	54030
KEGG C04420		Carbohydrates	C12H20O10	D-Fructofuranose 1,2':2,3'-dianhydride		RP pos	26310	23340	23340	25530	27650	21940	24770	29970	24780	24820	25470	24870	34600	39550	38330	51420	47750	51810	50290	45200	47490	47810	51160	47470	48050	43000	41630	44160	42200	15400	28740	30030	77160	84930	35890	22230	15370	40060	21160	15760	28370	38590	37320
HMDB0035240	https://hmdb.ca/metabolites/HMDB0035240	Benzofurans	C11H16O2	Dihydroactinidiolide		RP pos	4995	5217	6329	5390	6128	8033	7991	7716	9196	9008	8907	9090	10170	10640	11570	10940	10390	11660	10740	12690	10360	10180	11310	9888	8523	10000	11080	10500	11050	10950	10700	10880	11190	10730	12350	8865	9265	10110	11330	7817	11390	12420	10470
HMDB0000991	https://hmdb.ca/metabolites/HMDB0000991	Amino acids	C8H17NO2	DL-2-Aminooctanoic acid		RP pos	1314	1344	1226	1372	1456	1386	2460	1251	1871	1018	1523	2042	2007	1661	2035	1984	2016	1817	1776	1687	1875	2014	1870	1929	1745	1657	1789	1785	1856	1365	1207	2009	1285	666	1580	2122	2328	842.6	994.7	1470	1780	1300	2486
HMDB0002250	http://www.hmdb.ca/metabolites/HMDB02250	Acyl carnitines	C19H37NO4	Dodecanoylcarnitine		RP pos	1572	1834	2336	2239	2250	1712	1891	1951	2355	2453	1973	1680	1662	1891	1850	2455	1827	2249	2372	1658	2335	2048	1723	2749	2493	1763	2087	2925	2241	1596	2321	2427	2235	1894	2275	2728	2645	2220	3794	2856	2656	1865	2938
HMDB0000112	https://hmdb.ca/metabolites/HMDB0000112	Amino acids	C4H9NO2	gamma-Aminobutyric acid		RP pos	599.1	665.3	748.1	689.6	687.6	930.3	880.1	1017	900.1	991.7	672.3	880.2	1220	1050	1176	1316	1520	1622	1526	1252	1422	1481	1750	1440	1647	1353	1566	1525	1430	485.5	383.5	1417	844.6	965.1	1592	664.4	722.3	1242	536.3	341.3	1912	894.2	1451
HMDB0000086	http://www.hmdb.ca/metabolites/HMDB00086	Glycerophosphocholines	C8H20NO6P	Glycerophosphocholine		RP pos	43090	44830	46370	46900	49320	48700	50840	51560	52410	52780	52090	53070	55710	59050	59620	61210	61340	62550	63440	61240	63950	60510	67320	61710	63560	57980	60820	62490	54550	27770	21710	31680	38480	37350	45030	23910	21860	24290	26610	22710	27230	34200	53500
HMDB0000756	http://www.hmdb.ca/metabolites/HMDB00705	Acyl carnitines	C13H25NO4	Hexanoylcarnitine		RP pos	11120	11660	11180	11370	12530	11990	11160	12520	12390	13550	12470	12330	12820	12190	12210	12760	12270	11980	11340	12140	12570	12520	11550	11770	11860	12000	11950	12830	12710	4487	11380	13200	9240	17430	6619	10370	6719	5301	2830	9299	10130	8727	4216
HMDB0000157	http://www.hmdb.ca/metabolites/HMDB00157	Purines	C5H4N4O	Hypoxanthine		RP pos	35384.5	35090.9	38620.6	33972.1	37074.9	37671.4	36569.4	38614.4	37208.7	37964.4	38440.9	37233.1	38141.8	37495	38198.4	38199.4	38617.8	37497.7	38319.6	36232.6	36632.4	36600.1	38002.9	35249.8	36227.8	37010.8	37023.1	37437.5	37691.8	43940	35978.5	26825.8	79496	19015.8	26252	75219.9	31665.2	212007	22255.2	44394.8	34600.1	32321.6	32989.9
HMDB0029738	https://hmdb.ca/metabolites/HMDB0029738	Indoles	C11H11NO2	Indole-3-methyl acetate		RP pos	6783	7632	9405	10430	11430	11910	11390	14730	16580	17490	16730	19590	18610	18590	18200	20100	20270	24580	21520	23640	21250	24350	20400	24510	24370	21960	20390	23310	24420	1837	743.8	4854	8692	2231	1576	2459	9207	6286	2513	60120	11440	1661	120900
HMDB0000734	http://www.hmdb.ca/metabolites/HMDB00734	Indoles	C11H9NO2	Indoleacrylic acid		RP pos	5811	5300	5890	5828	5955	7129	5997	6728	6812	7393	6569	7236	7271	6455	6778	6910	6272	6763	6238	5977	5532	5625	5935	5331	5660	5272	4983	4889	5445	1898	3165	5429	23780	3561	8238	1900	9429	2202	5081	11070	10960	9358	7674
		Acyl carnitines	C15H27NO4	isomer of 2-Octenoylcarnitine		RP pos	899.9	856.4	1071	1067	1234	1071	1156	1218	1145	1430	1235	1345	1554	1165	1240	1348	1322	1437	1202	1184	1477	1539	1353	1368	1171	1673	1331	1432	1408	838.8	1521	1265	899.1	2906	1666	1936	1365	505.2	270.6	1221	1359	1418	707.2
		Acyl carnitines	C17H27NO4	Isomer of Decatrienoylcarnitine		RP pos	4837	5469	5984	5942	6309	5802	6336	6458	7803	8324	8931	8603	8510	7942	8285	8212	7669	8449	8188	8451	9233	7956	7339	7247	7659	7476	8032	8086	9176	5669	10330	10490	6612	15250	10320	6397	12710	4473	6780	5403	7324	4287	5807
HMDB0000688	http://www.hmdb.ca/metabolites/HMDB00688	Acyl carnitines	C12H23NO4	Isovalerylcarnitine		RP pos	8353	8838	8749	8332	8967	9066	9323	9745	10010	9599	10820	9726	9432	10490	9795	10390	10350	8890	10620	9143	8641	9917	10010	8255	9308	8910	8533	9695	7887	4988	5672	11180	8714	2746	10480	8438	7114	10930	7795	19190	14090	8592	10280
HMDB0000678	https://hmdb.ca/metabolites/HMDB0000678	Amino acids	C7H13NO3	Isovalerylglycine		RP pos	3712	3834	4338	4449	5473	5604	5277	6164	5708	6307	6276	6825	6336	6206	5848	6579	6966	5842	6479	6913	7087	6517	7422	6829	6578	7001	5987	6415	6496	12730	1493	836.6	9763	1511	11500	18360	1849	10890	1566	1674	20190	5497	1829
HMDB0000201	http://www.hmdb.ca/metabolites/HMDB00201	Acyl carnitines	C9H17NO4	L-Acetylcarnitine		RP pos	252400	272200	277600	290000	310200	313800	321700	331100	356200	348800	356600	351000	362600	382600	403200	398800	393000	386600	378000	370200	355000	343700	328900	320400	330800	350500	353700	351700	366000	164400	385400	287300	435800	433600	331500	331100	267900	210100	198700	354200	411200	383000	225100
HMDB0000161	https://hmdb.ca/metabolites/HMDB0000161	Amino acids	C3H7NO2	L-Alanine		RP pos	16765	16925.8	14572	16912.5	18204.2	15949.4	14540.5	16355.5	16269.9	15110.9	15193.4	17996	17148.2	17406.6	15723.7	17326.1	17621.5	17651.2	16143.7	16949.5	16779.2	18895.2	15780.4	17380.1	19544.5	16319.4	15147.6	17271.6	15516.3	12417.8	19003	11859.2	23911.1	23508	28729.8	10254.3	19011.7	13330.9	16707.7	25259.5	18233.9	23233.3	20464.3
HMDB0000517	http://www.hmdb.ca/metabolites/HMDB00517	Amino acids	C6H14N4O2	L-Arginine		RP pos	78857.8	81743	82292.5	81505.2	79314.1	81344.7	78914.4	83134.7	84664.5	81084.6	83662.3	77708.7	78719	80511.9	83822	83774.5	79222.8	80963.2	80106.1	81840.6	79842	80224.6	82417.5	81162.6	83306.4	78493.8	83232.1	84729.3	81856.8	39958.3	93372.1	62858.8	62534.6	94412.2	105430	49894.7	88280	67815.9	56802.1	35579.7	55700.4	58630.3	119455
HMDB0000062	http://www.hmdb.ca/metabolites/HMDB00062	Quaternary ammonium salts	C7H15NO3	L-Carnitine		RP pos	423000	471100	503200	533900	566600	579800	610400	654800	698700	711000	710500	745800	744200	788200	822800	837700	876200	862200	862300	835300	839600	818400	834400	817600	828600	792000	799800	841600	840100	433300	664600	714300	847700	692600	799400	521200	678700	776000	697100	643100	800000	808300	963000
HMDB0000192	http://www.hmdb.ca/metabolites/HMDB00192	Amino acids	C6H12N2O4S2	L-Cystine		RP pos	11240	11420	12350	12630	12700	12150	12580	13790	12370	12130	12670	12250	14600	15630	14860	16110	16340	16210	15840	16700	16440	16040	16640	16540	15520	15310	15410	16200	14370	6903	4171	2659	14550	15020	6811	8337	12390	1473	1970	3662	6883	4138	1639
HMDB0061115	http://www.hmdb.ca/metabolites/HMDB61115	Amino acids	C14H18N2O2	Lenticin		RP pos	24770	24450	24980	25750	27440	27640	26630	28390	29840	29490	29370	28990	27940	28350	26340	27410	26290	25310	24090	22900	25220	23390	24430	23770	22300	21790	21640	21950	21700	6439	11800	21610	106300	13430	36760	5463	40870	7143	18460	49210	47090	38570	28410
HMDB0028925	https://hmdb.ca/metabolites/HMDB0028925	Amino acids	C10H18N2O5	Leucyl-Aspartate		RP pos	33590	32400	34720	34150	34190	32820	32960	36780	36580	35620	34980	34710	34910	37860	37820	40240	42240	42400	42420	41140	43160	43260	42880	42090	41560	38520	39470	40090	40220	18200	25010	26550	62760	35020	53740	56080	39100	47170	34480	36280	39250	32400	48920
HMDB0011175	https://hmdb.ca/metabolites/HMDB0011175	Amino acids	C11H20N2O3	Leucylproline		RP pos	15390	17230	17160	16860	18150	17880	19660	18570	20970	20820	19700	19760	19380	22340	22480	22840	22730	22410	22360	22660	21740	21300	23600	22110	22520	21640	20830	21760	23050	8576	16660	15530	15210	31870	21370	16930	22210	19080	16830	23350	20500	20480	22420
HMDB0011170	http://www.hmdb.ca/metabolites/HMDB11170	Amino acids	C11H20N2O5	L-gamma-glutamyl-L-isoleucine		RP pos	10810	11050	10880	11450	11330	11280	10730	11780	12720	12360	11690	12310	11020	12530	12640	12450	13170	12120	12500	12060	11950	11840	11830	12240	11500	11590	10740	11700	12150	6025	8661	7883	17900	14970	13080	17180	11690	12490	7280	14130	13030	8865	19060
HMDB0011171	http://www.hmdb.ca/metabolites/HMDB11171	Amino acids	C11H20N2O5	L-gamma-glutamyl-L-leucine		RP pos	34360	35810	36960	36870	35420	37300	37800	39790	41900	41220	40170	40030	38980	40310	42470	43320	45540	44460	45310	43130	42360	43030	44690	42790	41080	40450	39110	42100	41000	19770	29210	29380	66910	33590	41620	51400	36220	42320	25910	41340	39730	33300	61600
HMDB0000177	http://www.hmdb.ca/metabolites/HMDB00177	Amino acids	C6H9N3O2	L-Histidine		RP pos	22317.3	22830	23756.2	23577.8	22959.2	23089	24320.7	24029.7	23403.4	23068.8	24984.6	22757.8	22724.3	22769.8	23082.2	21309	22254.9	22542.4	21982.6	23962.4	23338.1	22022.5	22063.5	22071.5	21323.8	22221.7	21428	21901.5	21945.4	4884.57	9359.68	9569.72	18030.1	10717.4	13470.6	15916.1	13692.6	6232.72	7850.64	11493.4	9511.21	11944.1	16092.4
HMDB0006461	http://www.hmdb.ca/metabolites/HMDB06461	Acyl carnitines	C25H45NO4	Linoelaidyl carnitine		RP pos	1860	1831	1490	1400	1880	1994	2127	1502	1563	1623	1890	2193	1451	1532	1029	1635	1344	1483	1618	1140	1434	1527	1381	1921	1380	1502	1339	1245	1354	355.5	688.3	991.9	634.4	358.8	449.1	406.5	1813	2115	908.8	2414	2370	1546	522.8
HMDB0000684	http://www.hmdb.ca/metabolites/HMDB00684	Organooxygen	C10H12N2O3	L-Kynurenine		RP pos	8162	8544	9103	8898	8422	8971	10220	9553	10030	9887	9446	9306	10150	11670	10360	11470	12260	12010	12690	11210	12100	13360	13190	13080	12110	11050	11510	10840	11610	447.2	1405	369.2	3746	1366	1884	1080	2174	928.9	758.7	647.6	1084	1219	3883
HMDB0000791	http://www.hmdb.ca/metabolites/HMDB00791	Acyl carnitines	C15H29NO4	L-Octanoylcarnitine		RP pos	17930	19820	22650	21880	25070	23210	25040	25100	29220	30960	32870	33250	31260	29980	29110	30990	29550	29780	29170	31070	31320	29540	28140	28650	27750	28660	31060	33360	32780	15850	24710	38340	17250	53630	17390	29690	23040	9852	5291	22070	25260	25780	8862
HMDB0000222	http://www.hmdb.ca/metabolites/HMDB00222	Acyl carnitines	C23H45NO4	L-Palmitoylcarnitine		RP pos	2323	2417	2975	2722	3217	2126	2367	2829	2752	2419	2153	2699	2485	2247	1812	1597	1659	1537	2043	1632	1812	1877	1352	1871	1853	2044	1867	1620	1675	164.7	1409	1975	565.7	240.8	84.98	291.7	1011	2819	1749	4474	2920	2658	583.2
HMDB0000162	http://www.hmdb.ca/metabolites/HMDB00162	Amino acids	C5H9NO2	L-Proline		RP pos	243626	242924	233546	243271	237498	244368	247370	250626	243627	249701	242188	245170	247021	239450	234804	240478	249338	240130	244267	243534	243337	250481	240560	243558	237932	243122	244687	238900	271844	133296	210223	249856	246925	245301	243690	222845	198581	245539	169940	314047	253325	164874	438268
HMDB0010379	https://hmdb.ca/metabolites/HMDB0010379	Glycerophosphocholines	C22H46NO7P	LysoPC(14:0)		RP pos	18020	18720	17250	17980	18160	17250	18460	18650	18980	18040	19510	19120	18180	19570	18110	20070	20010	18100	19270	18670	16810	17630	17710	16990	18230	17980	18180	19780	18470	7133	10880	10800	25140	13380	9275	7082	16870	29320	36660	14260	20070	30230	19960
HMDB0010381	https://hmdb.ca/metabolites/HMDB0010381	Glycerophosphocholines	C23H48NO7P	LysoPC(15:0)		RP pos	7522	7567	7324	7087	7099	7346	8789	8144	7468	7885	7595	7064	6672	7673	6128	7292	6927	6032	7879	7173	6611	6418	6487	6641	7792	5793	6603	5787	6330	885.8	4812	4628	5875	1015	2108	1987	7217	11590	11150	7864	8334	10790	5832
HMDB0010382	http://www.hmdb.ca/metabolites/HMDB10382	Glycerophosphocholines	C24H50NO7P	LysoPC(16:0)		RP pos	973400	968600	922400	948700	1168000	880000	883200	853300	965500	874400	881700	881100	824500	887700	897400	919800	899100	871000	888800	866800	848400	863200	852800	835600	883900	842600	803100	811700	828100	85970	567800	494500	672400	132700	227500	105700	633600	1430000	1227000	978800	836900	1100000	560500
HMDB0010383	http://www.hmdb.ca/metabolites/HMDB10383	Glycerophosphocholines	C24H48NO7P	LysoPC(16:1)		RP pos	22860	23810	22960	23990	23220	22060	24120	24050	24700	24350	24200	23710	24040	27110	23540	26590	24760	24080	24470	22900	20690	24140	24960	22320	25620	24010	22570	20790	22990	7248	12220	12610	20410	12070	8227	8150	20940	35630	38200	24890	22130	35260	19300
HMDB0002815	http://www.hmdb.ca/metabolites/HMDB02815	Glycerophosphocholines	C26H52NO7P	LysoPC(18:1)		RP pos	96760	106600	117300	118700	125100	119700	127200	116700	118500	116000	124100	121400	114300	129100	132100	135600	140600	135400	134300	125200	133800	132700	130500	125100	129600	126200	120000	131100	130900	19230	57190	79300	70510	39120	47740	27630	80360	167600	122600	114400	123700	145900	83380
HMDB0010386	http://www.hmdb.ca/metabolites/HMDB10386	Glycerophosphocholines	C26H50NO7P	LysoPC(18:2)		RP pos	142800	145900	139000	142400	143900	136800	140700	134300	136200	131600	133600	130500	129000	142000	130000	134100	135900	131800	135300	123600	138100	130300	127200	129200	134800	129400	121200	132400	130300	20330	51850	122900	61590	56800	76960	29440	131700	145600	132300	142100	163100	139700	150400
HMDB0010396	http://www.hmdb.ca/metabolites/HMDB10396	Glycerophosphocholines	C28H50NO7P	LysoPC(20:4)		RP pos	22080	22010	21680	22260	21320	21220	20220	20850	20770	22590	21730	21410	20480	22510	22940	21310	21500	21090	20980	20710	20420	21330	19770	21070	22840	20750	20450	22260	21100	4562	12530	15170	9623	7209	9777	4362	14940	18870	15750	24310	19730	22490	16870
HMDB0010397	http://www.hmdb.ca/metabolites/HMDB10397	Glycerophosphocholines	C28H48NO7P	LysoPC(20:5)		RP pos	4116	4154	3514	3594	4250	3892	4482	3446	3636	3907	3574	4394	3951	3763	4199	3796	4176	3323	3594	4307	3985	4220	3947	3849	3772	4272	3862	4270	3102	799.1	2821	3765	1220	1747	1921	2785	2536	22560	587.9	3834	2410	2819	3229
HMDB0010404	http://www.hmdb.ca/metabolites/HMDB10404	Glycerophosphocholines	C30H50NO7P	LysoPC(22:6)		RP pos	5645	6993	6003	5806	6129	6952	5688	5652	5765	6106	5232	5865	6422	5995	4606	5662	6151	5095	6034	5054	6187	4879	6137	5680	5177	5714	4839	5138	4549	741.5	3470	4319	1689	2195	1271	1157	2530	8776	2819	4220	3347	5798	3335
HMDB10407	https://hmdb.ca/metabolites/HMDB0010407	Glycerophosphocholines	C24H50NO6P	LysoPC(P-16:0/0:0)		RP pos	5507	7150	8126	7883	9004	7292	8401	8028	7768	7390	8523	7677	8282	9156	9247	9083	9671	10000	9000	8804	9545	9753	9127	9991	9318	9518	8448	8778	9663	630.4	3758	4961	3400	459.8	2284	859	4716	9582	7142	6411	5781	7003	4925
HMDB0011473	http://www.hmdb.ca/metabolites/HMDB11473	Glycerophosphoethanolamines	C21H44NO7P	LysoPE(16:0)		RP pos	14180	14130	13780	14120	14300	14420	13070	14760	14870	13980	14030	14400	14180	16140	13270	16310	15770	14770	13580	15110	13700	14410	14460	15360	15060	13780	12590	14550	15170	1059	7399	7385	6827	2238	1989	965	5964	14410	11630	11680	11280	12930	12230
HMDB0011507	http://www.hmdb.ca/metabolites/HMDB11507	Glycerophosphoethanolamines	C23H44NO7P	LysoPE(18:2)		RP pos	12800	12910	13220	12740	12920	12890	12410	12500	13660	12110	13500	12390	12550	12340	13770	14890	14360	13300	13320	12670	12830	13160	13160	13230	12280	12800	11710	12730	12910	1040	3006	8543	6136	5194	4391	2194	8059	10500	13920	8682	15440	12200	13140
HMDB0011487	http://www.hmdb.ca/metabolites/HMDB11487	Glycerophosphoethanolamines	C25H44NO7P	LysoPE(20:4)		RP pos	7140	7530	7360	7190	6837	6889	6199	7154	7174	6962	6567	5945	6644	7349	6434	7390	7142	6660	7310	6306	6906	6902	6349	7270	7676	5828	6226	6809	6262	514.2	3144	4080	1881	2073	1459	1124	2261	3543	3415	4685	5162	4186	3637
HMDB0011526	http://www.hmdb.ca/metabolites/HMDB11526	Glycerophosphoethanolamines	C27H44NO7P	LysoPE(22:6)		RP pos	4865	5141	4674	4797	5332	5119	5086	4515	5026	4723	5100	5283	4005	4821	4992	4686	5251	4913	4587	4684	4927	5291	4791	4882	4860	4349	4096	4591	5346	555.8	2013	2972	1817	2121	1188	594.4	976.1	4764	1316	2142	3460	3716	1905
HMDB0015654	https://hmdb.ca/metabolites/HMDB0015654	Acyl cholines	C8H17NO2	Methacholine		RP pos	10840	11540	12650	13190	13680	13370	14290	15550	16440	15630	16250	17590	16890	19410	19140	20060	19340	20290	19960	18660	18660	19380	19740	18680	19180	18580	18480	19630	20260	9326	15640	15590	19680	27230	20400	8222	9879	21760	13590	23440	14860	9198	17850
HMDB0062174	https://hmdb.ca/metabolites/HMDB0062174	Amino acids	C5H11NO4S	Methionine sulfone		RP pos	1505	1796	1726	1726	1822	1727	2046	2239	2166	1912	2442	2317	2836	2399	2952	3027	2898	3459	2502	2231	3781	3024	3345	3203	3336	3125	2373	2987	3094	1881	1101	1736	1512	1863	1719	583	4246	535.6	551.7	2204	984.7	1133	815.8
HMDB0002005	https://hmdb.ca/metabolites/HMDB0002005	Amino acids	C5H11NO3S	Methionine sulfoxide		RP pos	7997	8185	8482	9589	10600	9349	9921	11580	10810	11810	11740	13200	13890	14890	15030	17800	17240	16130	18620	16850	19180	18480	18510	18990	16390	17600	16740	18200	16480	17790	11750	9409	15890	10880	16140	15270	13800	18550	10560	10620	12700	16820	31700
HMDB04193	http://www.hmdb.ca/metabolites/HMDB04193	Pyridines	C7H8N2O2	N1-Methyl-2-pyridone-5-carboxamide		RP pos	9296	10400	12560	12930	13890	13920	13920	17500	16370	16540	17200	17530	16810	18490	19450	21270	20910	20930	20540	19670	20800	20500	21060	20660	21690	21570	20510	22190	21980	10570	13910	10810	16350	18220	13740	10560	11210	31770	11540	13710	19830	19840	12300
HMDB0004824	https://hmdb.ca/metabolites/HMDB0004824	Purine nucleosides	C12H17N5O5	N2,N2-Dimethylguanosine		RP pos	3908	4027	3444	3179	3110	3344	3076	3262	3371	2614	2909	3357	2291	2426	2157	1987	2310	1867	1928	2110	2196	2522	2774	2062	2105	1813	1828	1849	2228	1610	2448	3077	2041	2948	2398	3831	2484	1339	2364	2833	3260	2270	2188
HMDB0001325	http://www.hmdb.ca/metabolites/HMDB01325	Amino acids	C9H20N2O2	N6,N6,N6-Trimethyl-L-lysine		RP pos	4957	4859	5329	6574	6155	6401	6805	7906	7544	7713	8269	8583	8818	9109	10480	10930	11560	11170	11110	11070	11110	11310	10820	11060	10490	10330	10300	10490	10690	3150	6522	3986	6607	8323	17720	5324	7558	7374	5688	6046	13440	11250	8776
HMDB0001406	http://www.hmdb.ca/metabolites/HMDB01406	Pyridines	C6H6N2O	Niacinamide		RP pos	806.2	1062	1311	1147	865.4	1217	904.1	1565	1476	1503	1515	1248	1712	1600	2213	1987	2471	2275	2424	2314	2434	2441	2294	2269	2551	2323	2323	2428	2861	1174	2538	1324	2241	2348	2033	1564	1475	2467	948.7	1394	1847	2407	1207
HMDB0062631	http://www.hmdb.ca/metabolites/HMDB62631	Acyl carnitines	C17H33NO4	O-decanoyl-L-carnitine		RP pos	40070	43370	44520	45240	48060	46940	48920	50800	54960	52250	57580	55850	52720	51870	51600	51720	49840	51700	50710	49190	50810	51280	48560	48140	49280	49480	50170	53170	52280	19400	39400	69840	22980	73600	24460	41930	30880	15500	5209	40390	35810	37880	11060
HMDB0005065	http://www.hmdb.ca/metabolites/HMDB05065	Acyl carnitines	C25H47NO4	Oleoylcarnitine		RP pos	1907	2078	1968	1721	2289	2512	1815	2643	2481	3063	2518	2846	1902	2126	2134	2181	2063	2250	2159	1739	2031	2005	2156	2179	2343	1904	1832	2159	1764	106.1	1180	1356	468.9	120.2	471.5	144.6	721.9	2776	1091	2447	2898	1929	545.6
HMDB0001860	https://hmdb.ca/metabolites/HMDB0001860	Purines	C7H8N4O2	Paraxanthine		RP pos	741.4	904.4	1151	1546	1204	2292	1267	1871	1670	1446	1781	2052	1697	2320	2046	2237	2129	2503	3011	2213	2379	2469	2582	2434	2114	1926	2406	2308	2295	516.1	1054	1137	1387	4468	2613	1069	618	3462	3365	1014	3526	549	1658
HMDB0035589	http://www.hmdb.ca/metabolites/HMDB35589	Carbohydrates	C12H16O8	Phlorin		RP pos	2109	2286	2098	2437	2610	2113	2463	3090	2440	2367	2979	2367	2774	3610	3413	4341	3858	4434	4079	4390	4103	4379	4414	4155	4278	3935	3148	3615	3596	1383	2750	3010	6647	8011	3362	2113	1905	3183	1893	1852	2446	3958	3489
HMDB0001565	https://hmdb.ca/metabolites/HMDB0001565	Quaternary ammonium salts	C5H15NO4P	Phosphorylcholine		RP pos	2644	2673	3014	2668	3318	2617	3829	3525	3602	3709	3810	3451	4204	4015	4736	4821	4896	5290	5080	4587	4701	4439	4995	5644	3948	4708	4670	4488	4491	1681	3077	3359	3786	3471	3542	2843	2390	3570	2613	2551	3312	2998	5937
HMDB0000070	http://www.hmdb.ca/metabolites/HMDB00070	Amino acids	C6H11NO2	Pipecolic acid		RP pos	8393	8204	8553	8932	9892	9619	11210	13290	13010	13640	13570	13980	17050	16120	18160	19310	18480	18540	20210	18700	18600	17620	16970	18380	17720	17690	18270	17590	17920	3391	19310	10570	33470	1328	16500	4924	19640	7553	9009	6031	10940	21970	17440
HMDB0041993	http://www.hmdb.ca/metabolites/HMDB41993	Acyl carnitines	C12H23NO4	Pivaloylcarnitine		RP pos	8393	8849	8665	8307	8942	9089	9291	9692	9848	9534	10760	9717	9409	10630	9777	10420	10370	8948	10510	9114	8612	9883	9972	8223	9297	8885	8484	8220	7854	5009	5655	11260	8627	2731	10460	8453	7160	10890	7822	19190	14090	8629	10300
HMDB04827	http://www.hmdb.ca/metabolites/HMDB04827	Amino acids	C7H13NO2	Proline betaine		RP pos	121300	130600	142900	146700	161800	159000	169300	186300	203600	200600	205400	210400	206000	227700	243400	243600	250900	253200	240000	235600	234400	224700	227600	222100	225200	231100	223900	239800	235500	216500	22280	23310	265000	29080	64370	236600	42590	404500	113100	53120	517200	263200	240500
HMDB0006695	http://www.hmdb.ca/metabolites/HMDB06695	Amino acids	C10H16N2O4	Prolylhydroxyproline		RP pos	5851	6615	7192	6903	6738	7958	7176	6806	9799	8330	7937	8047	7678	8390	9743	8451	8191	8461	8160	8259	6849	7041	7275	7433	8042	8488	8668	9347	9050	7203	4455	3582	5118	11590	6624	6769	5524	9563	3523	3405	5936	6432	9085
HMDB0000824	http://www.hmdb.ca/metabolites/HMDB00824	Acyl carnitines	C10H19NO4	Propionylcarnitine		RP pos	26250	29770	29390	29890	31360	32480	31850	34650	35260	34940	35970	37600	35880	36030	34610	34040	34610	34340	33450	32660	33500	30790	33070	31370	31830	32080	32770	34050	34150	21360	30140	38140	35210	23590	33570	47920	47210	35080	30860	60260	48710	33810	40580
HMDB0013305	https://hmdb.ca/metabolites/HMDB0013305	Acyl cholines	C8H17NO2	Propionylcholine		RP pos	10890	11610	12750	12980	13480	13430	14320	15630	16510	15720	16380	17680	17030	19510	19170	20070	19380	20420	20060	18780	18770	19480	19810	18740	19770	18770	18570	19760	20390	9345	15760	15670	19550	27370	20510	8212	9852	21880	13650	23530	14940	9269	17950
HMDB0062558	http://www.hmdb.ca/metabolites/HMDB62558	Amino acids	C5H8N2O2	Pyroglutamine		RP pos	12370	12930	13690	14930	18650	17820	16170	21880	21060	20170	21960	22920	25220	25430	25530	31340	28390	29040	28050	27360	29200	28980	28990	29180	28940	27600	26760	28760	33310	6004	4940	7865	8389	36940	45810	14090	36490	11730	15760	15590	22500	24680	24620
HMDB0031641	https://hmdb.ca/metabolites/HMDB0031641	Pyrrolidines	C4H9N	Pyrrolidine		RP pos	24800	26640	29750	33450	34780	37180	38110	40410	44090	45440	45680	49550	47390	55600	56690	58300	60140	54700	56310	58040	56820	56700	57220	53760	51450	55420	57270	56060	59430	27590	30620	36110	54190	31920	57990	39590	35710	46650	38850	30690	38720	53720	62200
HMDB0029432	https://hmdb.ca/metabolites/HMDB0029432	Amino acids	C4H9NO3S	S-Methyl-L-cysteinesulfoxide		RP pos	6177	6960	7249	7588	8188	8114	7774	9510	9350	10210	9697	10190	10240	12030	12910	12600	12950	13150	12660	12080	12150	11670	12460	11820	12280	11940	12390	12870	13250	6711	8923	9173	11160	8541	15650	6801	8098	9503	8097	7084	10950	12420	13510
		Glycerophosphocholines	C22H46NO7P	sn2 LysoPC(14:0)		RP pos	2721	2600	2048	2657	2640	1971	1996	2709	2361	2300	2603	2905	2967	3309	2539	2764	2710	2580	2895	2449	2730	2572	2782	2261	2761	2742	2567	2678	2397	718.9	1019	1473	3359	1063	587.5	783.2	2111	4188	4320	1834	2372	4534	3199
		Glycerophosphocholines	C24H50NO7P	sn2 LysoPC(16:0)		RP pos	114600	113000	102200	107600	108100	103500	103900	106300	106200	101900	101900	102500	100700	111200	102800	106300	105200	99990	103500	98530	100400	99930	100000	99680	100600	94030	92490	89810	100500	10740	63090	57660	81060	14010	23310	14350	75360	159500	129600	119600	100600	146400	78610
		Glycerophosphocholines	C26H52NO7P	sn2 LysoPC(18:1)		RP pos	7661	7561	8187	8412	6549	6663	4867	5538	6431	6786	6122	7229	5876	6399	6051	5919	7535	6756	6803	6306	9536	5714	5270	5783	5498	5091	4603	5096	6004	1625	3257	5500	4781	2127	2092	1260	4087	9538	7337	7596	6546	9393	5869
		Glycerophosphocholines	C26H50NO7P	sn2 LysoPC(18:2)		RP pos	16280	15160	15240	15070	15460	14870	15710	14930	15110	14940	14750	15420	14450	14840	15350	13400	16240	14020	14570	14190	13800	13640	14250	12980	14550	13740	13500	13710	14050	2381	6126	14050	7783	6237	8783	2897	16920	16890	15050	16410	19170	17830	19420
		Glycerophosphocholines	C28H50NO7P	sn2 LysoPC(20:4)		RP pos	2038	2028	2056	1581	1469	1798	1723	1864	1905	2298	2080	2017	1701	1618	2318	1555	2048	2002	1794	1665	2118	2074	534.8	1660	1753	1337	1648	1475	1786	226.9	1026	1644	848.6	647.8	877.3	279.9	1948	2495	1121	2226	2071	2672	1647
HMDB0000269	http://www.hmdb.ca/metabolites/HMDB00269	Amines	C18H39NO2	Sphinganine		RP pos	8617	9260	8858	8833	10170	10680	10900	9556	10430	11010	10850	11170	10080	12480	11710	12230	12060	13270	14970	13670	14490	13280	14710	13840	14260	14730	15510	15440	16320	11750	13310	10810	14040	11380	16550	11410	11610	15020	11100	10620	14630	11440	11820
HMDB0000912	https://hmdb.ca/metabolites/HMDB0000912	Purine nucleosides	C14H17N5O8	Succinyladenosine		RP pos	2113	1879	1827	1798	1659	1777	1604	1483	1084	1463	1415	1313	1230	1161	1147	1051	1345	1354	1435	1216	1449	1136	1371	1637	1358	1225	1062	1293	1086	872.9	1115	1277	1151	2684	1033	1711	1329	742	1164	1651	1957	1155	1264
METLIN 414580		Amino acids	C15H29N5O4	Succinyl-leucyl-agmatine		RP pos	25500	26170	24390	25150	27820	26590	27840	24700	25020	25740	26690	27070	27420	25860	26450	26640	24010	22770	21910	23010	23590	21990	22210	21580	22420	24650	24070	25090	25740	32260	56150	31100	26730	37350	54460	35640	40820	28990	31910	28470	40050	31500	37410
HMDB0001539	http://www.hmdb.ca/metabolites/HMDB01539	Amino acids	C8H18N4O2	Symmetric dimethylarginine		RP pos	16780	17520	17910	19170	19410	19690	19930	21290	21650	21650	21360	21560	24230	23340	22610	22930	22220	23140	22930	20410	22610	21520	22310	21540	21810	22200	22090	22420	21780	12010	17960	17120	20590	28520	20480	15520	14950	14100	17630	15070	27280	20650	18680
HMDB0002366	https://hmdb.ca/metabolites/HMDB0002366	Acyl carnitines	C12H21NO4	Tiglylcarnitine		RP pos	1613	1782	2296	2098	2181	2345	2216	2198	2161	2145	2933	1913	2022	2309	2461	2396	2737	1998	1901	1658	2075	1872	1594	1733	1691	1701	1943	1832	1879	1551	1888	2214	1489	2400	2314	2064	1898	747.5	1334	3105	2995	2195	2231
HMDB0000925	https://hmdb.ca/metabolites/HMDB0000925	Aminoxides	C3H9NO	Trimethylamine N-oxide		RP pos	3937.93	4330.89	4094.78	4177.93	4420.19	4398.01	4170.14	4436.97	3936.89	4520.01	3918	3950.52	4209.21	4385.8	3638.36	3759.09	4048.97	4062.31	4009.52	4418.02	3948.2	4016.55	4098.44	4220.74	4061.89	4047.39	3999.25	4082.2	4227.28	1128.96	2016.55	664.307	2245.53	2659.34	6825.5	7428.89	2112.65	1349.91	880.62	6899.35	6403.71	4736.8	7472.52
HMDB00300	http://www.hmdb.ca/metabolites/HMDB00300	Pyrimidines	C4H4N2O2	Uracil		RP pos	10580	11380	12010	12120	13120	12360	13000	14260	14490	13820	14680	14040	15020	16980	16960	17630	18090	17940	18600	18140	18120	18050	18750	19110	19310	16850	17230	18180	18200	12940	12510	12420	19430	11850	18120	11420	11890	15880	13490	12100	14700	15440	14550
HMDB0000294	https://hmdb.ca/metabolites/HMDB0000294	Amino acids	CH4N2O	Urea		RP pos	119268	122313	113428	124171	115929	120455	125217	121127	125702	109580	127143	128942	120200	114549	123868	114542	116297	119263	118535	127744	126160	120029	118917	116990	118494	113609	123875	117735	117424	85719.2	108607	105733	109434	129371	118676	139828	110072	112262	100640	166257	156086	116472	117349
HMDB0013128	https://hmdb.ca/metabolites/HMDB0013128	Acyl carnitines	C12H23NO4	Valerylcarnitine		RP pos	8353	8838	8749	8332	8967	9066	9323	9745	10010	9599	10820	9726	9432	10490	9795	10390	10350	8890	10620	9143	8641	9917	10010	8255	9308	8910	8533	9695	7887	4988	5672	11180	8714	2746	10480	8438	7114	10930	7795	19190	14090	8592	10280
HMDB0014323	http://www.hmdb.ca/metabolites/HMDB14323	Amino acids	C24H29N5O3	Valsartan		RP pos	5484	5391	6132	6054	5665	5611	5718	6206	5825	6465	6455	5588	5397	5022	5881	4736	4478	5895	5083	4809	5441	4992	4945	4395	4365	4585	4905	4940	4824	45.78	28590	306.6	201.7	228.3	84.87	338.5	156.2	139.8	600.7	212.4	480	210.7	497.6
HMDB0000122	https://hmdb.ca/metabolites/HMDB0000122	Carbohydrates	C6H12O6	Glucose		HILIC neg	559500	595600	596200	582200	603500	594000	640400	559100	609400	635600	642200	636300	641000	661400	565400	577800	588300	670100	559000	627600	666400	647800	649100	661900	654500	656300	565800	612900	610600	370200	521900	699700	789000	1402000	555200	560100	380800	555400	478300	368300	572900	562900	536100
HMDB0000975	https://hmdb.ca/metabolites/HMDB0000975	Carbohydrates	C12H22O11	Trehalose		HILIC neg	59460	49020	62250	53350	46850	47210	53610	16430	56420	53260	55700	43290	46520	56800	42110	34340	48440	43920	31760	38980	22460	22950	17250	2502	28620	37390	32580	44870	44690	51890	43280	47540	48670	128800	40730	46120	37880	21830	15930	41410	63220	43940	61160
HMDB0000163	https://hmdb.ca/metabolites/HMDB0000163	Carbohydrates	C12H22O11	Maltose		HILIC neg	65580	57220	64300	58580	59160	62660	61950	19270	60200	61640	62410	63560	67630	60280	47080	45600	48530	49290	36980	33290	31160	18210	13730	3056	14230	15770	43380	56940	52070	32870	22950	34880	12280	34750	17300	28680	45530	14400	6141000	29290	26170	14290	36130
HMDB0000673	http://www.hmdb.ca/metabolites/HMDB00673	Fatty acids	C18H32O2	Linoleic acid		HILIC neg	1054000	1129000	1166000	1275000	1260000	1206000	1280000	1083000	1243000	972200	1271000	1263000	1227000	1239000	1219000	1221000	1216000	1236000	838900	1167000	1164000	1102000	1070000	942200	1025000	1024000	1224000	1242000	1164000	63590	250700	372500	352900	209100	186900	135800	306600	687600	179300	298600	448600	757200	149300
HMDB0000207	http://www.hmdb.ca/metabolites/HMDB00207	Fatty acids	C18H34O2	Oleic acid		HILIC neg	1790000	1909000	2002000	2213000	2168000	2152000	2230000	1973000	2187000	1707000	2175000	2181000	2170000	2170000	2204000	2132000	2150000	2184000	1391000	2070000	2009000	1955000	1934000	1712000	1782000	1782000	2193000	2239000	2131000	113700	467400	704900	641300	321200	441400	284900	336100	1078000	222900	495400	748400	1212000	398700
HMDB0000220	http://www.hmdb.ca/metabolites/HMDB00220	Fatty acids	C16H32O2	Palmitic acid		HILIC neg	3172000	3218000	3404000	3800000	3748000	3718000	3803000	2661000	3796000	3081000	3925000	4009000	3891000	3850000	3744000	3784000	3830000	3875000	3673000	3716000	3571000	3483000	3132000	2467000	3237000	3292000	3582000	3779000	3622000	1138000	3845000	3858000	2502000	3837000	5288000	2135000	2534000	4723000	4291000	3689000	2991000	3492000	3447000
HMDB0003229	https://hmdb.ca/metabolites/HMDB0003229	Fatty acids	C16H30O2	Palmitoleic acid		HILIC neg	322000	328900	340300	385900	378800	371500	367200	292000	356200	289800	374300	373700	373400	368600	355400	358300	364100	369600	322700	340500	321300	330300	288000	256900	307100	323000	365600	390600	367600	51230	122400	164400	174700	99680	169800	199600	137900	223000	100400	109900	149000	268100	257200
HMDB0031072	https://hmdb.ca/metabolites/HMDB0031072	Fatty acids	C14H28O2	12-Methyltridecanoic acid		HILIC neg	2390000	2402000	2559000	2729000	2708000	2690000	2767000	2252000	2766000	2155000	2847000	2820000	2759000	2798000	2691000	2715000	2783000	2739000	2699000	2606000	2575000	2503000	2354000	2100000	2307000	2292000	2563000	2696000	2613000	3919000	8482000	8841000	6548000	13600000	14980000	8956000	6919000	8938000	9481000	7773000	6708000	7324000	7005000
HMDB0041588	https://hmdb.ca/metabolites/HMDB0041588	Fatty acids	C15H30O2	2,6,10-Trimethyldodecanoic acid		HILIC neg	91390	94230	96120	110100	102000	105300	103300	85840	106900	75830	107900	106500	106000	100900	102400	108700	99200	99980	102100	102200	89240	95040	86410	77290	91320	87390	109600	106300	103100	67000	191400	223900	115200	259600	346300	190100	133700	205900	192300	172000	148800	157500	252500
HMDB0002259	https://hmdb.ca/metabolites/HMDB0002259	Fatty acids	C17H34O2	Heptadecanoic acid		HILIC neg	72960	77020	83800	95800	90840	90120	90800	65380	91280	70060	92370	91380	87020	87820	90040	87470	86880	87000	81660	87710	82540	75350	76770	59400	76500	77240	83070	85070	84590	45830	168900	170900	79140	243600	371200	144300	91210	217600	187200	162100	121200	141200	159900
HMDB0000827	https://hmdb.ca/metabolites/HMDB0000827	Fatty acids	C18H36O2	Stearic acid		HILIC neg	1564000	1592000	1656000	1865000	1832000	1821000	1949000	1254000	1915000	1521000	1911000	1913000	1886000	1877000	1834000	1824000	1912000	1940000	1696000	1831000	1748000	1714000	1466000	1117000	1575000	1628000	1734000	1817000	1728000	494800	1632000	1670000	745900	1729000	2504000	822800	830700	2634000	1967000	1607000	1148000	1364000	2046000
HMDB0001388	https://hmdb.ca/metabolites/HMDB0001388	Fatty acids	C18H30O2	alpha-Linolenic acid		HILIC neg	129800	124000	137600	142800	147100	138100	140500	96730	140500	114400	140800	140800	141700	143600	126900	132300	146900	132600	120800	129100	127200	123900	117000	84220	116300	118100	138100	142100	138300	10020	31630	41390	38830	22850	18640	14310	27600	85230	11750	19510	63580	66110	11390
HMDB0002212	https://hmdb.ca/metabolites/HMDB0002212	Fatty acids	C20H40O2	Arachidic acid		HILIC neg	15470	14820	14170	16620	16070	14930	18300	8981	18030	13130	18850	17370	16840	18030	16770	14620	16110	19120	14840	16240	17040	15190	13040	9705	13030	16080	15790	15490	17640	4781	8808	11130	5034	15020	22400	8774	4128	17700	14310	11160	9765	7745	14670
HMDB0034296	https://hmdb.ca/metabolites/HMDB0034296	Fatty acids	C20H38O2	11-Eicosenoic acid		HILIC neg	14610	12850	15150	15720	15740	16680	16940	10530	15270	13380	18030	15100	17350	14580	13290	17500	15160	15740	12450	13350	13920	13290	10560	9619	13120	16280	12520	14990	14480	1288	5817	8951	2180	5727	8752	5624	2574	8208	2885	4089	6331	5915	9599
HMDB0000012	https://hmdb.ca/metabolites/HMDB0000012	Pyrimidine nucleosides	C9H12N2O5	Deoxyuridine		HILIC neg	11390	12080	13060	11060	10160	10030	13410	14500	15350	14460	14720	14440	12930	13810	17390	16400	17700	16760	17140	16130	18700	15600	14960	13820	13680	17430	9246	10750	7470	14000	13530	15280	16860	10020	11560	10960	11860	17370	10800	12880	12070	12080	18880
HMDB0000089	https://hmdb.ca/metabolites/HMDB0000089	Pyrimidine nucleosides	C9H13N3O5	Cytidine		HILIC neg	6932	6508	7662	7114	6358	5384	6277	4893	6540	7373	6807	4677	5073	6758	6868	5755	5756	5852	6223	5301	6394	5014	4719	3299	6092	5167	5014	5508	6366	4328	3220	4648	3325	4678	5506	4498	2902	2015	3969	3828	4110	3996	5688
HMDB0000982	https://hmdb.ca/metabolites/HMDB0000982	Pyrimidine nucleosides	C10H15N3O5	5-Methylcytidine		HILIC neg	6206	6512	8120	7484	5472	5895	8159	4828	5412	5434	6497	5549	5601	6837	5641	4564	8003	5494	4679	4215	6538	3770	3326	2810	3472	4991	6088	6456	7525	3873	3795	5182	5862	8493	5987	4345	6606	3166	5763	650.2	4148	2438	6783
HMDB0000211	https://hmdb.ca/metabolites/HMDB0000211	Carbohydrates	C6H12O6	Inositol		HILIC neg	61400	63490	68460	57000	61010	60750	59570	51690	60870	54740	63420	55000	52860	59700	52120	48080	55480	58570	52070	52430	38590	38150	35880	42730	40790	52590	46410	55300	55830	31000	52560	32230	38850	68790	47150	43190	128200	29870	40250	48380	82580	45620	53120
[truncated: 260 more columns]
